# Supplementary material for: Jiawei Foshou San Induces Apoptosis in Ectopic Endometrium Based on Systems Pharmacology, Molecular Docking, and Experimental Evidence
Source: Evid Based Complement Alternat Med. 2019 Oct 27;2019:2360367. doi: 10.1155/2019/2360367 (PMC6855060; doi:10.1155/2019/2360367)
Supplement: Supplementary Materials — Table S1: detailed information on targets for JFS compounds. Table S2: detailed information on pharmacological targets of FDA-approved drugs. Table S3: 99 common targets between JFS targets and FDA-approved drug targets. Table S4: detailed information on common target-diseases and disease classification. Table S5: GO analysis and KEGG pathway enrichment of 99 common targets from DAVID. [file 2360367.f1.zip]

Archive with 5 entries (5 files):
- 2360367.f1/Table S1 Detail information of targets for JFS compounds.xlsx
- 2360367.f1/Table S2 Detail information of FDA approved drugs targets.xlsx
- 2360367.f1/Table S3 99 common targets.xlsx
- 2360367.f1/Table S4 Detail information of common target-diseases.xlsx
- 2360367.f1/Table S5 GO analysis and pathway enrichment.xlsx
