# Supplementary material for: Jiawei Foshou San Induces Apoptosis in Ectopic Endometrium Based on Systems Pharmacology, Molecular Docking, and Experimental Evidence
Source: Evid Based Complement Alternat Med. 2019 Oct 27;2019:2360367. doi: 10.1155/2019/2360367 (PMC6855060; doi:10.1155/2019/2360367)
Supplement: Supplementary Materials — Table S1: detailed information on targets for JFS compounds. Table S2: detailed information on pharmacological targets of FDA-approved drugs. Table S3: 99 common targets between JFS targets and FDA-approved drug targets. Table S4: detailed information on common target-diseases and disease classification. Table S5: GO analysis and KEGG pathway enrichment of 99 common targets from DAVID. [file 2360367.f1.zip › 2360367.f1/Table S1 Detail information of targets for JFS compounds.xlsx]

## Sheet: ligustrazine
Detail information of targets for ligustrazine
Gene name	Uniprot ID
HIF1A	Q16665
IL8	P10145
CFTR	P13569
VEGFA	P15692
TBXAS1	P24557
ITGA2B	P08514
GABRB2	P47870
GABRB3	P28472
F2	P00734
GPR27	Q9NS67

## Sheet: ferulic acid
Detail information of targets for ferulic acid
Gene name	Uniprot ID
ABCG2	Q9UNQ0
ABHD12	Q8N2K0
ABHD12B	Q7Z5M8
ABHD13	Q7L211
ABHD17A	Q96GS6
ABHD17B	Q5VST6
ABHD17C	Q6PCB6
ACHE	P22303
ACOT1	Q86TX2
ACOT2	P49753
ACOT4	Q8N9L9
ACOT6	Q3I5F7
ADRA1A	P35348
ADRA2A	P08913
ADRA2B	P18089
ADRB2	P07550
AKR1B1	P15121
AKR1C3	P42330
ALOX12	P18054
ALOX15	P16050
ALOX5	P09917
ALPI	P09923
APP	P05067
BAAT	Q14032
BACE1	P56817
CA1	P00915
CA12	O43570
CA13	Q8N1Q1
CA14	Q9ULX7
CA2	P00918
CA3	P07451
CA4	P22748
CA5A	P35218
CA5B	Q9Y2D0
CA6	P23280
CA7	P43166
CA9	Q16790
CAMK2A	Q9UQM7
CCND1	P24385
CDKN1A	P38936
CTRB1	P17538
CXCL1	P09341
CXCL2	P19875
CXCL3	P19876
CYCS	P99999
CYP1A1	P04798
CYP1A2	P05177
DECR1	Q16698
DHFR	P00374
EP300	Q09472
ESR2	Q92731
F3	P13726
G6PD	P11413
GLO1	Q04760
HSD11B1	P28845
HSD17B3	P37058
HSP90AB1	P08238
IKBKG	Q9Y6K9
KCNK2	O95069
LTA4H	P09960
MAOA	P21397
MAOB	P27338
MAPK1	P28482
MAPK3	P27361
MMP1	P03956
MMP2	P08253
MMP9	P14780
NFE2L2	Q16236
NOS2	P35228
NOS3	P29474
PGD	P52209
PIM1	Q9P1W9
PLAU	P00749
PTGS1	P23219
PTGS2	P35354
PTPN1	P18031
RELA	Q04206
SCD	O00767
SHBG	P04278
SLC6A2	P23975
SLC6A3	Q01959
TLR4	O00206
TOP2A	P11388
TRPV1	Q8NER1
TTR	P02766
TUBB1	Q9H4B7

## Sheet: tetrahydropalmatine
Detail information of targets for tetrahydropalmatine
Gene name	Uniprot ID
NCEH1	Q6PIU2
ABCF1	Q8NE71
ACBD3	Q9H3P7
ACOT9	Q9Y305
ALDH5A1	P51649
AP2A1	O95782
ARHGAP1	Q07960
ARIH1	Q9Y4X5
ARPC3	O15145
ARPP19	P56211
ATP2B1	P20020
BAD	Q92934
BAX	Q07812
BCAR1	P56945
BCL2	P10415
BZW1	Q7L1Q6
CALD1	Q05682
CALU	O43852
PRKCDBP	Q969G5
CC2D1B	Q5T0F9
CKAP5	Q14008
CLIP1	P30622
COA6	Q5JTJ3
COASY	Q13057
COPS2	P61201
COPS3	Q9UNS2
COX6C	P09669
CPT1A	P50416
CRIP2	P52943
CRYZ	Q08257
CSDE1	O75534
DCTN2	Q13561
DDX19B	Q9UMR2
DDX50	Q9BQ39
DECR2	Q9NUI1
DHX8	Q14562
DNAJB11	Q9UBS4
DRD2	P14416
DRD3	P35462
DRD4	P21917
DRD5	P21918
DYNC1I2	Q13409
EEF1A1	P68104
EEF1A2	Q05639
EIF1	P41567
EIF4A2	Q14240
F3	P13726
FAH	P16930
FAM136A	Q96C01
FKBP8	Q14318
FLYWCH2	Q96CP2
FMR1	Q06787
GALK1	P51570
GANAB	Q14697
GGH	Q92820
GLRX	P35754
GMPPB	Q9Y5P6
GPX4	P36969
GSN	P06396
GTPBP4	Q9BZE4
HIBCH	Q6NVY1
HINT2	Q9BX68
HMGA1	P17096
HMOX1	P09601
HNRNPCL1	O60812
HNRNPUL2	Q1KMD3
IGF2BP3	O00425
IPO9	Q96P70
IQGAP3	Q86VI3
JPT2	Q9H910
LETM1	O95202
LTA4H	P09960
MAK16	Q9BXY0
MAN1B1	Q9UKM7
MAP1B	P46821
MAP2K2	P36507
METAP2	P50579
MTOR	P42345
NCAPH	Q15003
NDUFB5	O43674
RDBP	P18615
NFU1	Q9UMS0
NIPSNAP1	Q9BPW8
NUBP2	Q9Y5Y2
NUFIP2	Q7Z417
NUP155	O75694
PAWR	Q96IZ0
PDS5A	Q29RF7
PICALM	Q13492
PIN1	Q13526
POTEI	P0CG38
PPIL3	Q9H2H8
PPP2CB	P62714
PRKAR1A	P10644
PRKCA	P17252
PRPF4	O43172
PRPSAP1	Q14558
WIBG	Q9BRP8
RAB3GAP1	Q15042
RAF1	P04049
RANBP2	P49792
RBM39	Q14498
REEP5	Q00765
RFC4	P35249
RHOB	P62745
RMND5A	Q9H871
RNF40	O75150
ROCK2	O75116
RPA2	P15927
RPS28	P62857
RPS6KA3	P51812
SEPT11	Q9NVA2
SLC25A10	Q9UBX3
SMARCA5	O60264
SMS	P52788
SNCG	O76070
SNRPE	P62304
SNW1	Q13573
SNX1	Q13596
SNX2	O60749
SPDL1	Q96EA4
SRI	P30626
SRP19	P09132
SRP68	Q9UHB9
SRPR	P08240
STAT1	P42224
STXBP1	P61764
SWAP70	Q9UH65
SYVN1	Q86TM6
TMA7	Q9Y2S6
TMED4	Q7Z7H5
TOP1	P11387
TSNAX	Q99598
TSR2	Q969E8
TTC37	Q6PGP7
UAP1	Q16222
UGT1A7	Q9HAW7
VPS45	Q9NRW7
WDHD1	O75717
ATAD3A	Q9NVI7
CSTB	P04080
DYNC1LI2	O43237
PALLD	Q8WX93
ADRA1B	P35368
ADRA1D	P25100
ADRA2C	P18825
ADRB1	P08588
ADRB2	P07550
CA2	P00918
CALM1	P62158
CHRM1	P11229
CHRM2	P08172
CHRM3	P20309
CHRM4	P08173
CHRM5	P08912
DPP4	P27487
DRD1	P21728
DRD2	P14416
DRD3	P35462
DRD5	P21918
F3	P13726
HSP90AA1	P07900
HTR1A	P08908
HTR2A	P28223
HTR2C	P28335
HTR3A	P46098
KCNH2	Q12809
NCOA1	Q15788
OPRD1	P41143
OPRM1	P35372
PTGS1	P23219
PTGS2	P35354
RXRA	P19793
RXRB	P28702
SCN5A	Q14524
SIGMAR1	Q99720
SLC6A2	P23975
SLC6A3	Q01959
SLC6A4	P31645
CHRFAM7A	Q494W8
CHRNA2	Q15822
CHRNA3	P32297
CHRNA4	P43681
CHRNA7	P36544
CHRNB2	P17787
CHRNB4	P30926
CYBA	P13498
CYBB	P04839
GRIN3A	Q8TCU5
NCF1	P14598
NCF2	P19878
NCF4	Q15080
OPRK1	P41145
PGRMC1	O00264
RAC1	P63000
RAC2	P15153
RAC3	P60763
