# Supplementary material for: Jiawei Foshou San Induces Apoptosis in Ectopic Endometrium Based on Systems Pharmacology, Molecular Docking, and Experimental Evidence
Source: Evid Based Complement Alternat Med. 2019 Oct 27;2019:2360367. doi: 10.1155/2019/2360367 (PMC6855060; doi:10.1155/2019/2360367)
Supplement: Supplementary Materials — Table S1: detailed information on targets for JFS compounds. Table S2: detailed information on pharmacological targets of FDA-approved drugs. Table S3: 99 common targets between JFS targets and FDA-approved drug targets. Table S4: detailed information on common target-diseases and disease classification. Table S5: GO analysis and KEGG pathway enrichment of 99 common targets from DAVID. [file 2360367.f1.zip › 2360367.f1/Table S2 Detail information of FDA approved drugs targets.xlsx]

## Sheet: Sheet1
Detail information of pharmacologically active targets of the drugs approved by FDA
Gene Name	UniProt ID
ftsI	P45059
F13A1	P00488
NOS2	P35228
NNT	Q13423
IDH3A	P50213
CACNA1I	Q9P0X4
ADORA1	P30542
ABL1	P00519
FCER1A	P12319
F8	P00451
PTGS1	P23219
rpsD	P0A7V8
DRD1	P21728
FLT4	P35916
SCNN1B	P51168
COL1A1	P02452
TUBB1	Q9H4B7
NDUFV3	P56181
FLT1	P17948
SLC7A11	Q9UPY5
INSR	P06213
embA	P9WNL9
RAF1	P04049
F5	P12259
PDXK	O00764
EDNRB	P24530
CHRM3	P20309
SLC12A5	Q9H2X9
F2	P00734
FCER1G	P30273
ALAD	P13716
HSD3B1	P14060
mdh	P61889
NA	P06818
MMP9	P14780
HSD3B2	P26439
CNR1	P21554
AGTR1	P30556
PTGER1	P34995
MS4A1	P11836
NOS1	P29475
LDHB	P07195
PLA2G10	O15496
PPARA	Q07869
GHR	P10912
HPRT1	P00492
RXRB	P28702
TPH2	Q8IWU9
CKB	P12277
CD52	P31358
HTR4	Q13639
FTL	P02792
KCNH2	Q12809
TOP1MT	Q969P6
CHRM1	P11229
CNR2	P34972
CYSLTR2	Q9NS75
mrdA	P44469
SOAT1	P35610
P2RY12	Q9H244
HRH2	P25021
POLB	P06746
dld	P06149
ebgA	P06864
PTGIS	Q16647
SLC18A2	Q05940
ABCA1	O95477
TPH1	P17752
embB	P9WNL7
ESR1	P03372
folC	P08192
rpsI	P0A7X3
GABRR1	P24046
HBA1	P69905
AR	P10275
ALDH2	P05091
LHCGR	P22888
SLC7A3	Q8WY07
DBH	P09172
SCN1A	P35498
penA	P0A3M5
TUBB	P07437
RARG	P13631
DRD5	P21918
FLT3	P36888
TLR7	Q9NYK1
SIGMAR1	Q99720
TPK1	Q9H3S4
OGDH	Q02218
VEGFA	P15692
AVPR1A	P37288
CKMT1A	P12532
ADRB1	P08588
SDHA	P31040
SCN10A	Q9Y5Y9
CPT2	P23786
PDE5A	O76074
CD22	P20273
GSS	P48637
rpoC	P9WGY7
SCNN1A	P37088
SCN11A	Q9UI33
ALDH3B2	P48448
SCN5A	Q14524
GNRHR	P30968
PDGFRB	P09619
RARB	P10826
ABCC8	Q09428
KCNK2	O95069
PLG	P00747
PPARG	P37231
F10	P00742
GABBR1	Q9UBS5
ATP2C1	P98194
ACE	P12821
ADH1A	P07327
FXYD2	P54710
MTTP	P55157
ERG11	P10613
SLC1A5	Q15758
LPL	P06858
SERPINE1	P05121
ADORA2B	P29275
BCL2	P10415
CHRM5	P08912
ALOX5	P09917
SLC6A1	P30531
PNP	P00491
TYR	P14679
ABAT	P80404
PRKAB1	Q9Y478
rpoB	P0A8V2
PTGS2	P35354
NOS3	P29474
MME	P08473
CA1	P00915
REN	P00797
CD3E	P07766
rpsL	P0A7S3
SERPINC1	P01008
SLC12A2	P55011
TUB2	P10875
ADRA2A	P08913
SIGMAR1	Q5T1J1
HTR1A	P08908
AVPR2	P30518
gor	P06715
blaZ	P00807
CACNB1	Q02641
HTR3A	P46098
P	P24024
THRB	P10828
HSD17B10	Q99714
SCTR	P47872
CA2	P00918
TYMS	P04818
RRM1	P23921
MTNR1B	P49286
HSD11B1	P28845
DHFR	P00374
SHMT1	P34896
inhA	P9WGR1
F7	P08709
ureC	P18314
TTR	P02766
ADRA2C	P18825
UL54	P08546
CYP17A1	P05093
PRLR	P16471
GRIK1	P39086
ATP4A	P20648
ASIC1	P78348
ADORA3	P0DMS8
CACNA1A	O00555
ALK	Q9UM73
F9	P00740
GRIN1	Q05586
gyrA	P43700
PTGER2	P43116
KDR	P35968
RFK	Q969G6
SLC6A8	P48029
HADH	Q16836
CAMLG	P49069
PROC	P04070
GABRA2	P47869
DHODH	Q02127
TACR1	P25103
IFNAR2	P48551
FSHR	P23945
DRD4	P21917
SNAP25	P60880
HTR2B	P41595
ELANE	P08246
GRIN2D	O15399
gp41	Q53I07
FTH1	P02794
ADH1B	P00325
CCKAR	P32238
GGCX	P38435
ODC1	P11926
CHRM4	P08173
CPT1A	P50416
CKMT2	P17540
CHRNA10	Q9GZZ6
RXRA	P19793
GLRA3	O75311
KCNN4	O15554
IL11RA	Q14626
GRIN2B	Q13224
SLC12A3	P55017
OPRD1	P41143
ANXA1	P04083
LDHA	P00338
ACHE	P22303
parC	P43702
CACNA1C	Q13936
CALCR	P30988
GLRA1	P23415
PDE3A	Q14432
ITGA2B	P08514
HRH1	P35367
HTR2A	P28223
SSTR1	P30872
KIT	P10721
HPD	P32754
TK	Q9QNF7
HTR1F	P30939
rpoA	P0A7Z4
NTSR2	O95665
ADH1C	P00326
katG	P9WIE5
IFNGR2	P38484
murA	P0A749
ABCC9	O60706
GABRA5	P31644
GNRHR2	Q96P88
trxB	P66010
PTGIR	P43119
UGCG	Q16739
GABRA4	P48169
CACNA1G	O43497
SLC6A2	P23975
PDE4B	Q07343
mrcB	P02919
TSHR	P16473
SCNN1D	P51172
SCNN1G	P51170
polA	P00582
ADRA1A	P35348
SLC12A1	Q13621
TPO	P07202
CASR	P41180
ERBB2	P04626
TK	P06478
MTNR1A	P48039
ITGAL	P20701
EDNRA	P25101
GABRA3	P34903
QPRT	Q15274
GCGR	P47871
ALB	P02768
CHD1	O14646
HTR2C	P28335
GRIN3B	O60391
CA4	P22748
FGA	P02671
SRD5A1	P18405
GAPDH	P04406
POLA1	P09884
frdA	P00363
KCNMA1	Q12791
P	Q05486
NPR1	P16066
PGR	P06401
fabH	P0A6R0
CHRM2	P08172
IL1R1	P14778
SMOX	Q9NWM0
GAMT	Q14353
FOLH1	Q04609
ADRA2B	P18089
HMGCR	P04035
ADRA1B	P35368
pbpA	Q8XJ01
SQLE	Q14534
DRD3	P35462
NA	P11485
SRD5A2	P31213
mrcA	P02918
ITGA4	P13612
embC	P9WNL5
BLVRB	P30043
SLC25A4	P12235
SLC12A4	Q9UP95
PTGFR	P43088
TH	P07101
ATP4B	P51164
nfsA	P17117
AKR1C2	P52895
SLC25A6	P12236
GHRHR	Q02643
PDE7B	Q9NP56
CSF2RA	P15509
HBB	P68871
M	P21430
PDE10A	Q9Y233
OPRK1	P41145
BRAF	P15056
HCAR2	Q8TDS4
GRIA1	P42261
GRIN3A	Q8TCU5
MMP2	P08253
KCNJ1	P48048
TUB1	P87066
SLC6A3	Q01959
GSR	P00390
HTR7	P34969
IL2RB	P14784
EPOR	P19235
PLA2G4A	P47712
IL2RA	P01589
HTR1D	P28221
IFNAR1	P17181
RARA	P10276
HIV-1 protease	O90777
CALY	Q9NYX4
NR3C2	P08235
CD33	P20138
PRKAA1	Q13131
CACNG1	Q06432
L	P26676
PNLIP	P16233
F	P13843
THRA	P10827
FFAR1	O14842
FGF1	P05230
ERG11	P50859
CACNA2D1	P54289
ADRB2	P07550
FKBP1A	P62942
TNF	P01375
CYSLTR1	Q9Y271
PDE7A	Q13946
RXRG	P48443
KCNJ11	Q14654
SLC25A5	P05141
FCGR1A	P12314
IFNGR1	P15260
VKORC1	Q9BQB6
CKM	P06732
ADRA1D	P25100
PLAUR	Q03405
CD2	P06729
IMPDH2	P12268
BGLAP	P02818
CYP11B1	P15538
ATP1A1	P05023
ddlA	P0A6J8
MTR	Q99707
TSPO	P30536
CHRNA2	Q15822
RYR1	P21817
TOP2A	P11388
rplJ	P0A7J6
dacB	P24228
GLRA2	P23416
FGFR2	P21802
SLC6A4	P31645
PAH	P00439
DRD2	P14416
TBXA2R	P21731
GRIN2A	Q12879
IMPDH1	P20839
GABRA6	Q16445
CLCN2	P51788
EGFR	P00533
poxB	P07003
OPRM1	P35372
AVPR1B	P47901
SERPIND1	P05546
FDPS	P14324
MUT	P22033
VDR	P11473
MDH2	P40926
KCNA1	Q09470
NNMT	P40261
ABCC1	P33527
pbpC	P42971
ESR2	Q92731
CSF3R	Q99062
NR3C1	P04150
GABRA1	P14867
HTR1B	P28222
parC	P0AFI2
gyrB	P0AES6
fabF	P0AAI5
fabB	P0A953
NPC1L1	Q9UHC9
folP	P0AC13
ileS	P41972
citC	P77390
alr	Q9L888
HCAR3	P49019
MGAM	O43451
SRC	P12931
YES1	P07947
EPHA2	P29317
LCK	P06239
rplC	Q9A1X4
OXTR	P30559
CD86	P42081
CD80	P33681
MC2R	Q01718
CHRNA4	P43681
CHRNB2	P17787
PDGFRA	P16234
CSF1R	P07333
DPP4	P27487
C5	P01031
PLIN3	O60664
GLP1R	P43220
IGF1R	P08069
RAMP1	O60894
RAMP2	O60895
RAMP3	O60896
CACNA1H	O95180
CARTPT	Q16568
MAP2K1	Q02750
PTK2B	Q14289
CYP51A1	Q16850
GAA	P10253
SLC22A11	Q9NSA0
HDAC9	Q9UKV0
GART	P22102
CTLA4	P16410
FADS1	O60427
DNMT1	P26358
PLAU	P00749
ALPPL2	P10696
KCNQ2	O43526
FCGR3B	O75015
PRDX5	P30044
CCR5	P51681
MET	P08581
IL6	P05231
CXCR4	P61073
MMP1	P03956
MAPK1	P28482
ADORA2A	P29274
F2R	P25116
PROS1	P07225
IFNG	P01579
HTR6	P50406
EGF	P01133
NR1I2	O75469
FASN	P49327
DPYD	Q12882
SMS	P52788
MMP13	P45452
TFPI	P10646
HRH3	Q9Y5N1
SERPINB2	P05120
TOP1	P11387
IL12B	P29460
ACE2	Q9BYF1
TGFB1	P01137
SLC8A1	P32418
TPMT	P51580
SV2A	Q7L0J3
NPR2	P20594
TNFSF13B	Q9Y275
AOC3	Q16853
PPARD	Q03181
ADRB3	P13945
FGF2	P09038
ROCK1	Q13464
F11	P03951
TRPV1	Q8NER1
TNNC1	P63316
CCND1	P24385
ABCB1	P08183
IL3RA	P26951
NTRK1	P04629
JUN	P05412
VWF	P04275
TAAR1	Q96RJ0
CCL2	P13500
IL1B	P01584
MAPK3	P27361
SLC22A6	Q4U2R8
ABCC2	Q92887
PLA2G6	O60733
PLCL1	Q15111
ICAM1	P05362
NFKB1	P19838
PLAT	P00750
KLK1	P06870
MAP2	P11137
RET	O43519
CD44	P16070
MMP3	P08254
TRPA1	O75762
KCNJ12	Q14500
PRKCA	P17252
PDE4A	P27815
TNFRSF1A	P19438
SCN9A	Q15858
DPEP1	P16444
IKBKB	O14920
ITGB3	P05106
XIAP	P98170
CCKBR	P32239
PROCR	Q9UNN8
CASP3	P42574
TLR2	O60603
MAP1A	P78559
TLR9	Q9NR96
SI	P14410
F3	P13726
FN1	P02751
MMP8	P22894
IDE	P14735
TRPM8	Q7Z2W7
GRM5	P41594
CFTR	P13569
MMP12	P39900
FGFR4	P22455
CAT	P04040
IL5	P05113
vatD	P50870
ATIC	P31939
botB	P10844
BTK	Q06187
PDE4D	Q08499
SYK	P43405
TUBA1A	Q71U36
ampC	P00811
TUBB4B	P68371
TUBA4A	P68366
TK	P03176
tetX	P04958
TUBB3	Q13509
ampC	P05364
ampC	P05193
C1S	P09871
METAP2	P50579
bla	P62594
MMP16	P51512
PLA2G2A	P14555
CA12	O43570
PARP1	P09874
PRSS1	P07477
NR1H4	Q96RI1
fusA	P13551
TGFBR2	P37173
TBXAS1	P24557
TXNRD1	Q16881
bla	P0AD63
bla	P0A9Z7
dacA	P0AEB2
SCN2A	Q99250
SCN3A	Q9NY46
SCN4A	P35499
folP1	P0C0X1
folP2	P0C0X2
ESRRG	P62508
COMT	P21964
CYP19A1	P11511
FGB	P02675
FGG	P02679
C1R	P00736
FCGR3A	P08637
FCGR2A	P12318
FCGR2B	P31994
FCGR2C	P31995
IL2RG	P31785
PRG2	P13727
CSF2RB	P32927
FGFR1	P11362
FGFR3	P22607
GLP2R	O95838
VAMP1	P23763
VAMP2	P63027
SYT2	Q8N9I0
MS4A2	Q01362
PPP3R2	Q96LZ3
SSTR5	P35346
DDC	P20711
BCHE	P06276
TYMP	P19971
MAOB	P27338
MAOA	P21397
XDH	P47989
CDK6	Q00534
ADA	P00813
CDK4	P11802
CACNA1B	Q00975
FADS2	O95864
ELOVL4	Q9GZR5
SDHD	O14521
VKORC1L1	Q8N0U8
GABBR2	O75899
CHRNA7	P36544
GABRB1	P18505
GABRB3	P28472
GABRB2	P47870
PSMB1	P20618
PSMB5	P28074
PSMB2	P49721
N/A	P03198
PDE4C	Q08493
CACNB2	Q08289
CACNA1S	Q13698
CACNB4	O00305
CACNA1F	O60840
CACNB3	P54284
CACNA1D	Q01668
N/A	Q27738
ydbK	P52647
HDAC1	Q13547
HDAC2	Q92769
HDAC3	O15379
HDAC6	Q9UBN7
PTGER3	P43115
PIK3CA	P42336
MTOR	P42345
gyrB	P0A0K8
RHD	A6PZ59
pbpX	P14677
ftsI	P0AD68
CDC60	Q9HGT2
CACNA2D2	Q9NY47
KCNQ3	O43525
P2RY2	P41231
NS5b	O39930
PIK3CD	O00329
JAK2	O60674
RET	P07949
APEX1	P27695
IL4R	P24394
NOXO1	Q8NFA2
TOP2B	Q02880
S1PR5	Q9H228
KLKB1	P03952
KCNJ8	Q15842
TLR4	O00206
EPCAM	P16422
RRM2	P31350
rplV	P61177
rplD	P60725
AMY2A	P04746
por	P94692
CES1	P23141
DCK	P27707
blaCTX-M-14	Q9L5C7
IL6R	P08887
PGF	P49763
ANXA3	P12429
ribC	P0AFU8
SIRT5	Q9NXA8
LEPR	P48357
TEK	Q02763
MAPK11	Q15759
APP	P05067
PDE2A	Q8IW54
ponA	Q04707
FFAR4	Q5NUL3
CPB2	Q96IY4
ITGB7	P26010
IL23A	Q9NPF7
TRPV3	Q8NET8
MAP3K1	Q13233
PDCD1	Q15116
CHRNA7	Q693P7
MPL	P40238
CD274	Q9NZQ7
C3	P01024
CD3D	P04234
CD3G	P09693
CD247	P20963
IL5RA	Q01344
MAPT	P10636
MAP4	P27816
TNFRSF8	P28908
CD4	P01730
SLAMF7	Q9NQ25
JAK3	P52333
CD19	P15391
GUCY2C	P25092
PTH1R	Q03431
BDKRB2	P30411
TNFSF11	O14788
PTGER4	P35408
NA	P27907
SSTR2	P30874
SSTR3	P32745
CYP11A1	P05108
ADK	P55263
TNNC2	P02585
GGPS1	O95749
MR1	Q95460
ITGB1	P05556
ITGAV	P06756
mecA	C1KC03
GUCY1A2	P33402
mrdA	P0AD65
NISCH	Q9Y2I1
KCNK3	O14649
KCNK9	Q9NPC2
CHRNB4	P30926
CHRNA3	P32297
GABRG2	P18507
GABRG1	Q8N1C3
GABRG3	Q99928
GABRE	P78334
GABRP	O00591
GABRQ	Q9UN88
GABRR2	P28476
GABRD	O14764
BCR/ABL fusion	A9UF02
KCND2	Q9NZV8
KCND3	Q9UK17
AKR1D1	P51857
RRM2B	Q7LG56
POLE	Q07864
POLE2	P56282
POLE4	Q9NR33
POLE3	Q9NRF9
mecA	Q53707
GABRR3	A8MPY1
LIPF	P07098
penA	P08149
pbp3	Q60FT7
penA	P0A3M6
CA3	P07451
CA7	P43166
CA14	Q9ULX7
SCN1B	Q07699
SCN2B	O60939
SCN3B	Q9NY72
SCN4B	Q8IWT1
SLC22A8	Q8TCC7
rplD	P60723
rpmF	P49228
rpsJ	Q5SHN7
dacC	P08506
mrcA	Q07806
ponB	Q9X6W0
pbpA	Q70KI2
MMP10	P09238
MMP7	P09237
MMP11	P24347
MMP14	P50281
MMP15	P51511
MMP17	Q9ULZ9
MMP19	Q99542
MMP20	O60882
MMP21	Q8N119
MMP23A	O75900
MMP24	Q9Y5R2
MMP25	Q9NPA2
MMP26	Q9NRE1
MMP27	Q9H306
MMP28	Q9H239
rpoC	P0A8T7
rpsN	P0AG59
rpsM	P0A7S9
rpsS	P0A7U3
TUBD1	Q9UJT1
TUBE1	Q9UJT0
TUBG1	P23258
rplD	P44345
pbpC	P76577
gyrA	P72524
gyrB	P0A4L9
parC	P72525
parE	Q59961
PARP2	Q9UGN5
ATP6V1B2	P21281
RPL3	P39023
PDK1	Q15118
bla	P62593
PLA2G1B	P04054
N/A	Q91RS4
PARP3	Q9Y6F1
botA	P10845
pol	Q72547
ampC	Q93CA2
JAK1	P23458
bla	P0AD64
ROCK2	O75116
N/A	Q89ZI2
pbpA	Q8DR59
pbp1b	Q7CRA4
fabI	Q6GI75
MT-CYB	Q02768
pbpG	P0AFI5
rdxA	O25608
MB	P02144
M6PR	P20645
TK	P09250
ECHS1	P30084
KCNA4	P22459
ACAA1	P09110
ATP6V1C1	P21283
IDH2	P48735
pbp3	Q75Y35
pbp2a	Q8DNB6
pbpB	Q51504
pbpA	Q9X6V3
rpsC	P0A7V3
rpsH	P0A7W7
rpsG	P02359
sulI	P0C002
FOL1	P53848
SMO	Q99835
KRT12	Q99456
ERG7	Q04782
fksA	A2QLK4
ERG1	Q92206
CPS1	P31327
F12	P00748
SLC18A1	P54219
FCGR1B	Q92637
C4A	P0C0L4
C4B	P0C0L5
GANAB	Q14697
GANC	Q8TET4
NS3/4A	B0B3C9
HMMR	O75330
PTH2R	P49190
KCNA2	P16389
KCNA3	P22001
KCNA5	P22460
KCNA6	P17658
KCNA7	Q96RP8
KCNA10	Q16322
KCNB1	Q14721
KCNB2	Q92953
KCNC1	P48547
KCNC2	Q96PR1
KCNC3	Q14003
KCND1	Q9NSA2
sigA1	Q18BX5
VEGFB	P49765
PSMB9	P28065
PSMB10	P40306
PSMB8	P28062
DDR2	Q16832
FRK	P42685
BCR	P11274
MAP2K2	P36507
ANO1	Q5XXA6
pagA	P13423
atpE	P9WPS1
rpl2	P20276
SLC5A2	P31639
CRBN	Q96SW2
KEAP1	Q14145
SLC7A7	Q9UM01
ERBB4	Q15303
SLC22A12	Q96S37
N/A	F1L7U3
GABRA1	P14867
GABRA2	P47869
GABRA3	P34903
GABRA4	P48169
GABRA5	P31644
GABRA6	Q16445
GABRB1	P18505
GABRB2	P47870
GABRB3	P28472
GABRD	O14764
GABRE	P78334
GABRG1	Q8N1C3
GABRG2	P18507
GABRG3	Q99928
GABRP	O00591
GABRQ	Q9UN88
SLC52A2	Q9HAB3
GRIN1	Q05586
GRIN2A	Q12879
GRIN2B	Q13224
GRIN2C	Q14957
GRIN2D	O15399
GRIN3A	Q8TCU5
GRIN3B	O60391
pol	Q72874
pol	Q7ZJM1
GLRA1	P23415
GLRB	P48167
HTR1A	P08908
HTR1B	P28222
HTR1D	P28221
HTR1E	P28566
HTR1F	P30939
HTR2A	P28223
HTR2B	P41595
HTR2C	P28335
HTR3A	P46098
HTR3B	O95264
HTR3C	Q8WXA8
HTR3D	Q70Z44
HTR3E	A5X5Y0
HTR4	Q13639
HTR6	P50406
HTR7	P34969
ADRA1A	P35348
ADRA1B	P35368
ADRA1D	P25100
ADRA2A	P08913
ADRA2B	P18089
ADRA2C	P18825
ADRB1	P08588
ADRB2	P07550
ADRB3	P13945
ADRA1A	P35348
ADRA1B	P35368
ADRA1D	P25100
ADRA2A	P08913
ADRA2B	P18089
ADRA2C	P18825
DRD1	P21728
DRD5	P21918
SCN1A	P35498
SCN10A	Q9Y5Y9
SCN11A	Q9UI33
SCN2A	Q99250
SCN3A	Q9NY46
SCN4A	P35499
SCN5A	Q14524
SCN7A	Q01118
SCN8A	Q9UQD0
SCN9A	Q15858
SCN1B	Q07699
SCN2B	O60939
SCN3B	Q9NY72
SCN4B	Q8IWT1
CACNG1	Q06432
CACNA2D1	P54289
CACNA2D2	Q9NY47
CACNA2D3	Q8IZS8
CACNA1C	Q13936
CACNA1D	Q01668
CACNA1F	O60840
CACNA1S	Q13698
CACNB1	Q6TME4
CACNB1	Q02641
CACNB2	Q08289
CACNB3	P54284
CACNB4	O00305
CACNA1B	Q00975
CACNA1A	O00555
CACNA1G	O43497
CACNA1H	O95180
CACNA1I	Q9P0X4
NFKB2	Q00653
NFKB1	P19838
KCNJ1	P48048
KCNJ10	P78508
KCNJ11	Q14654
KCNJ12	Q14500
KCNJ14	Q9UNX9
KCNJ15	Q99712
KCNJ8	Q15842
KCNMA1	Q12791
KCNMB1	Q16558
KCNMB2	Q9Y691
KCNMB3	Q9NPA1
KCNMB4	Q86W47
KCNN4	O15554
KCNN1	Q92952
KCNN2	Q9H2S1
KCNN3	Q9UGI6
MAOA	P21397
MAOB	P27338
PDE1A	P54750
PDE1B	Q01064
PDE1C	Q14123
PDE10A	Q9Y233
PDE4A	P27815
PDE4B	Q07343
PDE4C	Q08493
PDE4D	Q08499
PDE7B	Q9NP56
PDE2A	O00408
PDE3A	Q14432
PDE3B	Q13370
PDE5A	O76074
PDE6C	P51160
PDE11A	Q9HCR9
PDE7A	Q13946
PDE8A	O60658
PDE8B	O95263
PDE9A	O76083
PDE6A	P16499
PDE6B	P35913
RYR2	Q92736
PTAFR	P25105
P2RX4	Q99571
IL17A	Q16552
HCRTR1	O43613
HCRTR2	O43614
gyrA	P0AES4
pbp4	P72355
EXP-1	P04926
PCSK9	Q8NBP7
per1	P37321
bla	Q9F663
blaUOE-1	Q9EXV5
NS5A	Q5L478
S1PR1	P21453
NS3	A3EZI9
NS5b	P87764
CRHR1	P34998
TRHR	P34981
ureB	Q8KT33
VMAT2	Q99870
IL12B	P29460
IL23A	Q9NPF7
HDAC1	Q13547
HDAC10	Q969S8
HDAC11	Q96DB2
HDAC2	Q92769
HDAC3	O15379
HDAC4	P56524
HDAC5	Q9UQL6
HDAC6	Q9UBN7
HDAC7	Q8WUI4
HDAC8	Q9BY41
HDAC9	Q9UKV0
ABCC8	Q09428
KCNJ11	Q14654
toxB	P18177
CACNA1C	Q13936
CACNA1D	Q01668
CACNA1F	O60840
CACNA1S	Q13698
CACNB1	Q02641
CACNB2	Q08289
CACNB3	P54284
CACNB4	O00305
CACNA1G	O43497
CACNA1H	O95180
CACNA1I	Q9P0X4
DGAT2	Q96PD7
TFRC	P02786
ACTN1	P12814
KRT2	P35908
F13B	P05160
SMN2	B4DP61
TRM2	F5HGI9
TRM1	F5HC79
TRM3	F5HCU8
RPE65	Q16518
BMPR1A	P36894
SSTR4	P31391
CACNA1E	Q15878
NOD2	Q9HC29
BMPR2	Q13873
UL122	P06434
UL122	P06435
DIO3	P55073
MRC1	P22897
FGF23	Q7Z4T2
SLC5A5	Q92911
DNApol	Q91CQ6
N/A	P18640
botD	P19321
N/A	Q00496
botF	P30996
botG	Q60393
fox-7	Q53IN1
MIR-1	Q9X757
blaSHV	A8DZJ2
KPC-2	Q93LQ9
N/A	Q86DI9
DRD1	P21728
DRD5	P21918
DRD2	P14416
DRD3	P35462
DRD4	P21917
GAST	P01350
GluClX	Q25634
rpsK	L0LZJ6
ABCG2	Q9UNQ0
ACACB	O00763
aceE	P0AFG8
ACKR1	Q16570
ADCY1	Q08828
AGTR2	P50052
AKR1B1	P15121
AKR1C3	P42330
ALDH3A2	P51648
ALDH5A1	P51649
ALPL	P05186
AOX1	Q06278
APOB	P04114
ARSB	P15848
BCR/ABL	Q16189
blaZ	P00807
BLLF1	P68344
BLVRA	P53004
CAMP	P49913
CD1A	P06126
CD28	P10747
CD58	P19256
CEACAM3	P40198
CELA1	Q9UNI1
CHRNA1	P02708
CPT1B	Q92523
CRHR1	P34998
CSF2	P04141
CSF3	P09919
CTNNB1	P35222
CXCR2	P25025
CYP2C9	P11712
CYP2D6	P10635
dacA	P0AEB2
ddl	P9WP31
DGAT1	O75907
DIO1	P49895
DPYSL2	Q16555
DXR	O96693
ERG1	Q92206
ERG11	P10613
F	P03420
FAAH	O00519
fabI	Q965D5
FECH	P22830
FGF4	P08620
FHIT	P49789
folP	P0AC13
FOLR1	P15328
frdA	O06913
fusA	C1CC62
FYN	P06241
GALNS	P34059
GBA	P04062
GHSR	Q92847
glc-5	Q9GQW8
GSC2	P40989
GSK3A	P49840
GUCY2D	Q02846
HA	P03437
HLA-DRB1	P04229
HNMT	P50135
HPGDS	O60760
IDO1	P14902
IDS	P22304
IFNA2	P01563
IFNA8	P32881
IFNB1	P01574
IL12A	P29459
IL2	P60568
ileS	P00956
inhA	P9WGR1
INS	P01308
KCNQ1	P51787
LDLR	P01130
leuS	A6QHU1
lmrP	Q9CDQ3
LTA4H	P09960
M	P06821
mrcA	P02918
MT-ND3	P03897
murA	P0A749
NAGLU	P54802
NEU1	Q6Q4G9
NR1I3	Q14994
pagA	P13423
parC	Q6G9K4
pbp2	F4NA87
PDF	Q9HBH1
PFF0160c	Q08210
PFOR	Q968X7
PIK3CG	P48736
PMI1	P34948
pol	Q69617
PPAT	Q06203
PPIA	P62937
PPIB	P23284
PPOX	P50336
PPP1CA	P62136
PPP3CA	Q08209
PRKCG	P05129
PTH	P01270
PTPN1	P18031
PTPRS	Q13332
RAB9A	P51151
COP1	Q8NHY2
RIR1	P08543
ROS1	P08922
rplJ	P0A7J3
S1PR1	P21453
SCD	O00767
SCT	P09683
SERPINA1	P01009
SERPINA6	P08185
SERPING1	P05155
SLC23A2	Q9UGH3
SLC29A1	Q99808
SLC5A6	Q9Y289
SMAD3	P84022
SST	P61278
STAT3	P40763
TK1	P04183
TMP1	P12461
TPP1	O14773
TPSAB1	Q15661
UL122	P19893
UL30	P07918
ureC	P18314
vanYB	Q47746
