# Supplementary material for: Jiawei Foshou San Induces Apoptosis in Ectopic Endometrium Based on Systems Pharmacology, Molecular Docking, and Experimental Evidence
Source: Evid Based Complement Alternat Med. 2019 Oct 27;2019:2360367. doi: 10.1155/2019/2360367 (PMC6855060; doi:10.1155/2019/2360367)
Supplement: Supplementary Materials — Table S1: detailed information on targets for JFS compounds. Table S2: detailed information on pharmacological targets of FDA-approved drugs. Table S3: 99 common targets between JFS targets and FDA-approved drug targets. Table S4: detailed information on common target-diseases and disease classification. Table S5: GO analysis and KEGG pathway enrichment of 99 common targets from DAVID. [file 2360367.f1.zip › 2360367.f1/Table S3 99 common targets.xlsx]

## Sheet: ligustrazine
Detail information of 7 common targets in ligustrazine
Gene name	Uniprot ID
ITGA2B	P08514
VEGFA	P15692
CFTR	P13569
TBXAS1	P24557
GABRB3	P28472
GABRB2	P47870
F2	P00734

## Sheet: ferulic acid
Detail information of 44 common targets in ferulic acid
Gene name	Uniprot ID
MAPK3	P27361
TLR4	O00206
TOP2A	P11388
ACHE	P22303
APP	P05067
ESR2	Q92731
ADRA1A	P35348
KCNK2	O95069
CA12	O43570
CA4	P22748
ALOX5	P09917
ADRA2B	P18089
NOS3	P29474
CA1	P00915
PLAU	P00749
ADRA2A	P08913
CA3	P07451
CA7	P43166
CA14	Q9ULX7
NOS2	P35228
MMP1	P03956
MAPK1	P28482
MAOB	P27338
MAOA	P21397
HSD11B1	P28845
DHFR	P00374
MMP2	P08253
TUBB1	Q9H4B7
TTR	P02766
MMP9	P14780
TRPV1	Q8NER1
CCND1	P24385
LTA4H	P09960
PTPN1	P18031
SCD	O00767
AKR1B1	P15121
ABCG2	Q9UNQ0
AKR1C3	P42330
F3	P13726
PTGS1	P23219
SLC6A2	P23975
CA2	P00918
ADRB2	P07550
SLC6A3	Q01959

## Sheet: tetrahydropalmatine
Detail information of 54 common targets in tetrahydropalmatine
Gene name	Uniprot ID
RXRB	P28702
KCNH2	Q12809
ADRA1D	P25100
GANAB	Q14697
CHRM4	P08173
CHRM1	P11229
CPT1A	P50416
RXRA	P19793
OPRD1	P41143
PRKCA	P17252
SLC6A4	P31645
DRD2	P14416
HTR2A	P28223
OPRM1	P35372
MAP2K2	P36507
DRD5	P21918
F3	P13726
SIGMAR1	Q99720
ADRB1	P08588
SLC6A2	P23975
SCN5A	Q14524
METAP2	P50579
DPP4	P27487
HTR2C	P28335
BCL2	P10415
CHRM5	P08912
CHRM2	P08172
PTGS2	P35354
ADRA1B	P35368
DRD3	P35462
HTR1A	P08908
HTR3A	P46098
CA2	P00918
PTGS1	P23219
DRD1	P21728
SMS	P52788
ADRA2C	P18825
SLC6A3	Q01959
TOP1	P11387
RAF1	P04049
CHRM3	P20309
ROCK2	O75116
ADRB2	P07550
MTOR	P42345
DRD4	P21917
CHRNA2	Q15822
CHRNA3	P32297
CHRNA4	P43681
CHRNA7	P36544
CHRNB2	P17787
CHRNB4	P30926
GRIN3A	Q8TCU5
OPRK1	P41145
ALDH5A1	P51649
