# Supplementary material for: Jiawei Foshou San Induces Apoptosis in Ectopic Endometrium Based on Systems Pharmacology, Molecular Docking, and Experimental Evidence
Source: Evid Based Complement Alternat Med. 2019 Oct 27;2019:2360367. doi: 10.1155/2019/2360367 (PMC6855060; doi:10.1155/2019/2360367)
Supplement: Supplementary Materials — Table S1: detailed information on targets for JFS compounds. Table S2: detailed information on pharmacological targets of FDA-approved drugs. Table S3: 99 common targets between JFS targets and FDA-approved drug targets. Table S4: detailed information on common target-diseases and disease classification. Table S5: GO analysis and KEGG pathway enrichment of 99 common targets from DAVID. [file 2360367.f1.zip › 2360367.f1/Table S4 Detail information of common target-diseases.xlsx]

## Sheet: Sheet1
Detail information of target-related diseases and diseases classification
Gene name	Disease	Group
PRKCA	Acquired Immunodeficiency Syndrome	Virus Diseases
TOP1	Acquired Immunodeficiency Syndrome	Virus Diseases
DRD2	Acromegaly	Musculoskeletal Diseases
OPRD1	Alcoholism	Mental Disorders
ACHE	Alcoholism	Mental Disorders
DRD2	Alcoholism	Mental Disorders
HTR2A	Alcoholism	Mental Disorders
HTR2C	Alcoholism	Mental Disorders
ADRA2B	Alcoholism	Mental Disorders
ADRA2A	Alcoholism	Mental Disorders
MAOA	Alcoholism	Mental Disorders
ADRA2C	Alcoholism	Mental Disorders
OPRK1	Alcoholism	Mental Disorders
CHRM1	Alzheimer's Disease	Nervous System Diseases
ACHE	Alzheimer's Disease	Nervous System Diseases
DRD2	Alzheimer's Disease	Nervous System Diseases
APP	Alzheimer's Disease	Nervous System Diseases
CHRM5	Alzheimer's Disease	Nervous System Diseases
CHRM2	Alzheimer's Disease	Nervous System Diseases
PTGS2	Alzheimer's Disease	Nervous System Diseases
HTR1A	Alzheimer's Disease	Nervous System Diseases
MAOB	Alzheimer's Disease	Nervous System Diseases
MAOA	Alzheimer's Disease	Nervous System Diseases
PTGS1	Alzheimer's Disease	Nervous System Diseases
ADRA2C	Alzheimer's Disease	Nervous System Diseases
CHRM3	Alzheimer's Disease	Nervous System Diseases
DRD1	Alzheimer's Disease	Nervous System Diseases
SLC6A3	Alzheimer's Disease	Nervous System Diseases
SIGMAR1	Alzheimer's Disease	Nervous System Diseases
CHRNA4	Alzheimer's Disease	Nervous System Diseases
CHRNA7	Alzheimer's Disease	Nervous System Diseases
CHRNB2	Alzheimer's Disease	Nervous System Diseases
CHRNB4	Alzheimer's Disease	Nervous System Diseases
SLC6A4	Anesthesia	Anesthesia and Analgesia
OPRM1	Anesthesia	Anesthesia and Analgesia
SLC6A2	Anesthesia	Anesthesia and Analgesia
SCN5A	Anesthesia	Anesthesia and Analgesia
HTR3A	Anesthesia	Anesthesia and Analgesia
CHRNA2	Anesthesia	Anesthesia and Analgesia
CHRNA7	Anesthesia	Anesthesia and Analgesia
KCNH2	Angina pectoris	Cardiovascular Diseases
DRD2	Angina pectoris	Cardiovascular Diseases
ITGA2B	Angina pectoris	Cardiovascular Diseases
ADRB1	Angina pectoris	Cardiovascular Diseases
SCN5A	Angina pectoris	Cardiovascular Diseases
TBXAS1	Angina pectoris	Cardiovascular Diseases
NOS3	Angina pectoris	Cardiovascular Diseases
F2	Angina pectoris	Cardiovascular Diseases
OPRD1	Anxiety	Behavior and Behavior Mechanisms
ACHE	Anxiety	Behavior and Behavior Mechanisms
SLC6A4	Anxiety	Behavior and Behavior Mechanisms
DRD2	Anxiety	Behavior and Behavior Mechanisms
HTR2A	Anxiety	Behavior and Behavior Mechanisms
ADRB1	Anxiety	Behavior and Behavior Mechanisms
SLC6A2	Anxiety	Behavior and Behavior Mechanisms
HTR2C	Anxiety	Behavior and Behavior Mechanisms
HTR1A	Anxiety	Behavior and Behavior Mechanisms
MAOB	Anxiety	Behavior and Behavior Mechanisms
MAOA	Anxiety	Behavior and Behavior Mechanisms
DHFR	Anxiety	Behavior and Behavior Mechanisms
GABRB2	Anxiety	Behavior and Behavior Mechanisms
ADRB2	Anxiety	Behavior and Behavior Mechanisms
SIGMAR1	Anxiety	Behavior and Behavior Mechanisms
KCNH2	Arrhythmia	Cardiovascular Diseases
ADRA1D	Arrhythmia	Cardiovascular Diseases
ADRB1	Arrhythmia	Cardiovascular Diseases
ADRA1A	Arrhythmia	Cardiovascular Diseases
SCN5A	Arrhythmia	Cardiovascular Diseases
TBXAS1	Arrhythmia	Cardiovascular Diseases
ADRA2B	Arrhythmia	Cardiovascular Diseases
ADRA1B	Arrhythmia	Cardiovascular Diseases
ADRA2A	Arrhythmia	Cardiovascular Diseases
ADRA2C	Arrhythmia	Cardiovascular Diseases
F2	Arrhythmia	Cardiovascular Diseases
ADRB2	Arrhythmia	Cardiovascular Diseases
OPRD1	Arthritis	Musculoskeletal Diseases
ALOX5	Arthritis	Musculoskeletal Diseases
PTGS2	Arthritis	Musculoskeletal Diseases
CA1	Arthritis	Musculoskeletal Diseases
NOS2	Arthritis	Musculoskeletal Diseases
MMP1	Arthritis	Musculoskeletal Diseases
MAPK1	Arthritis	Musculoskeletal Diseases
CA2	Arthritis	Musculoskeletal Diseases
PTGS1	Arthritis	Musculoskeletal Diseases
MMP2	Arthritis	Musculoskeletal Diseases
MMP9	Arthritis	Musculoskeletal Diseases
ROCK2	Arthritis	Musculoskeletal Diseases
TRPV1	Arthritis	Musculoskeletal Diseases
AKR1B1	Arthritis	Musculoskeletal Diseases
CHRM4	Asthma	Respiratory Tract Diseases
DRD2	Asthma	Respiratory Tract Diseases
OPRM1	Asthma	Respiratory Tract Diseases
ADRB1	Asthma	Respiratory Tract Diseases
TBXAS1	Asthma	Respiratory Tract Diseases
ALOX5	Asthma	Respiratory Tract Diseases
CHRM2	Asthma	Respiratory Tract Diseases
PTGS2	Asthma	Respiratory Tract Diseases
NOS2	Asthma	Respiratory Tract Diseases
ADRA2C	Asthma	Respiratory Tract Diseases
TRPV1	Asthma	Respiratory Tract Diseases
ADRB2	Asthma	Respiratory Tract Diseases
CHRNA7	Asthma	Respiratory Tract Diseases
RXRB	Atherosclerosis	Cardiovascular Diseases
F3	Atherosclerosis	Cardiovascular Diseases
ALOX5	Atherosclerosis	Cardiovascular Diseases
ITGA2B	Atherosclerosis	Cardiovascular Diseases
HSD11B1	Atherosclerosis	Cardiovascular Diseases
CHRM4	Attention Deficit Hyperactivity Disorder	Mental Disorders
SLC6A4	Attention Deficit Hyperactivity Disorder	Mental Disorders
DRD2	Attention Deficit Hyperactivity Disorder	Mental Disorders
SLC6A2	Attention Deficit Hyperactivity Disorder	Mental Disorders
CHRM5	Attention Deficit Hyperactivity Disorder	Mental Disorders
ADRA1B	Attention Deficit Hyperactivity Disorder	Mental Disorders
ADRA2A	Attention Deficit Hyperactivity Disorder	Mental Disorders
SLC6A3	Attention Deficit Hyperactivity Disorder	Mental Disorders
CHRNA7	Attention Deficit Hyperactivity Disorder	Mental Disorders
DRD2	Bacterial Infections	Bacterial Infections and Mycoses
SCN5A	Bacterial Infections	Bacterial Infections and Mycoses
METAP2	Bacterial Infections	Bacterial Infections and Mycoses
MAOB	Bacterial Infections	Bacterial Infections and Mycoses
DHFR	Bacterial Infections	Bacterial Infections and Mycoses
PTPN1	Bacterial Infections	Bacterial Infections and Mycoses
SCD	Bacterial Infections	Bacterial Infections and Mycoses
MTOR	Bladder Cancer	Neoplasms
PTGS2	Bladder Cancer	Neoplasms
TOP1	Bladder Cancer	Neoplasms
MMP9	Bladder Cancer	Neoplasms
MMP2	Bladder Cancer	Neoplasms
MMP1	Brain Cancer	Nervous System Diseases
MMP2	Brain Cancer	Nervous System Diseases
MAPK3	Brain Injuries, Traumatic	Nervous System Diseases
SLC6A3	Brain Injuries, Traumatic	Nervous System Diseases
APP	Brain Injuries, Traumatic	Nervous System Diseases
NOS3	Brain Injuries, Traumatic	Nervous System Diseases
SIGMAR1	Brain Injuries, Traumatic	Nervous System Diseases
ACHE	Brain Ischemia	Cardiovascular Diseases
DRD2	Breast Cancer	Neoplasms
ESR2	Breast Cancer	Neoplasms
CA4	Breast Cancer	Neoplasms
BCL2	Breast Cancer	Neoplasms
PTGS2	Breast Cancer	Neoplasms
CA1	Breast Cancer	Neoplasms
PLAU	Breast Cancer	Neoplasms
CA14	Breast Cancer	Neoplasms
CA2	Breast Cancer	Neoplasms
DHFR	Breast Cancer	Neoplasms
MMP2	Breast Cancer	Neoplasms
TOP1	Breast Cancer	Neoplasms
SIGMAR1	Breast Cancer	Neoplasms
CHRM1	Bronchitis	Respiratory Tract Diseases
DRD2	Bronchitis	Respiratory Tract Diseases
CHRM5	Bronchitis	Respiratory Tract Diseases
CHRM2	Bronchitis	Respiratory Tract Diseases
CHRM3	Bronchitis	Respiratory Tract Diseases
ADRB2	Bronchitis	Respiratory Tract Diseases
ALOX5	Cervical Cancer	Female Urogenital Diseases and Pregnancy Complications
SLC6A4	Cocaine Addiction	Mental Disorders
DRD2	Cocaine Addiction	Mental Disorders
SLC6A2	Cocaine Addiction	Mental Disorders
DRD3	Cocaine Addiction	Mental Disorders
DRD1	Cocaine Addiction	Mental Disorders
SLC6A3	Cocaine Addiction	Mental Disorders
CHRM1	Cognition Disorders	Mental Disorders
ACHE	Cognition Disorders	Mental Disorders
DRD2	Cognition Disorders	Mental Disorders
APP	Cognition Disorders	Mental Disorders
SLC6A2	Cognition Disorders	Mental Disorders
ADRA1A	Cognition Disorders	Mental Disorders
HTR1A	Cognition Disorders	Mental Disorders
MAOB	Cognition Disorders	Mental Disorders
DRD1	Cognition Disorders	Mental Disorders
CHRNA7	Cognition Disorders	Mental Disorders
PTGS1	Colitis, Ulcerative	Digestive System Diseases
MMP9	Colitis, Ulcerative	Digestive System Diseases
MTOR	Colitis, Ulcerative	Digestive System Diseases
ALOX5	Colitis, Ulcerative	Digestive System Diseases
VEGFA	Colorectal Cancer	Neoplasms
PTGS2	Colorectal Cancer	Neoplasms
PTGS1	Colorectal Cancer	Neoplasms
TOP1	Colorectal Cancer	Neoplasms
MMP9	Colorectal Cancer	Neoplasms
OPRD1	Cough	Respiratory Tract Diseases
OPRM1	Cough	Respiratory Tract Diseases
SIGMAR1	Cough	Respiratory Tract Diseases
SCN5A	Cough	Respiratory Tract Diseases
CHRM5	Cough	Respiratory Tract Diseases
TRPV1	Cough	Respiratory Tract Diseases
SLC6A4	Cough	Respiratory Tract Diseases
OPRD1	Depression	Behavior and Behavior Mechanisms
SLC6A4	Depression	Behavior and Behavior Mechanisms
DRD2	Depression	Behavior and Behavior Mechanisms
HTR2A	Depression	Behavior and Behavior Mechanisms
OPRM1	Depression	Behavior and Behavior Mechanisms
SLC6A2	Depression	Behavior and Behavior Mechanisms
ADRA1A	Depression	Behavior and Behavior Mechanisms
HTR2C	Depression	Behavior and Behavior Mechanisms
CHRM5	Depression	Behavior and Behavior Mechanisms
DRD3	Depression	Behavior and Behavior Mechanisms
HTR1A	Depression	Behavior and Behavior Mechanisms
MAOB	Depression	Behavior and Behavior Mechanisms
MAOA	Depression	Behavior and Behavior Mechanisms
ADRA2C	Depression	Behavior and Behavior Mechanisms
SLC6A3	Depression	Behavior and Behavior Mechanisms
SIGMAR1	Depression	Behavior and Behavior Mechanisms
ALOX5	Dermatitis	Skin and Connective Tissue Diseases
PTGS1	Dermatitis	Skin and Connective Tissue Diseases
F2	Dermatitis	Skin and Connective Tissue Diseases
TRPV1	Dermatitis	Skin and Connective Tissue Diseases
CHRM1	Dermatitis, Seborrheic	Skin and Connective Tissue Diseases
CHRM2	Dermatitis, Seborrheic	Skin and Connective Tissue Diseases
CHRM3	Dermatitis, Seborrheic	Skin and Connective Tissue Diseases
ADRA1D	Diabetes	Nutritional and Metabolic Diseases
TLR4	Diabetes	Nutritional and Metabolic Diseases
HTR2A	Diabetes	Nutritional and Metabolic Diseases
OPRM1	Diabetes	Nutritional and Metabolic Diseases
VEGFA	Diabetes	Nutritional and Metabolic Diseases
ADRB1	Diabetes	Nutritional and Metabolic Diseases
METAP2	Diabetes	Nutritional and Metabolic Diseases
DPP4	Diabetes	Nutritional and Metabolic Diseases
HTR2C	Diabetes	Nutritional and Metabolic Diseases
TBXAS1	Diabetes	Nutritional and Metabolic Diseases
PTGS2	Diabetes	Nutritional and Metabolic Diseases
NOS2	Diabetes	Nutritional and Metabolic Diseases
MMP1	Diabetes	Nutritional and Metabolic Diseases
PTGS1	Diabetes	Nutritional and Metabolic Diseases
DRD1	Diabetes	Nutritional and Metabolic Diseases
HSD11B1	Diabetes	Nutritional and Metabolic Diseases
ADRA2C	Diabetes	Nutritional and Metabolic Diseases
RAF1	Diabetes	Nutritional and Metabolic Diseases
TRPV1	Diabetes	Nutritional and Metabolic Diseases
PTPN1	Diabetes	Nutritional and Metabolic Diseases
SCD	Diabetes	Nutritional and Metabolic Diseases
AKR1B1	Diabetes	Nutritional and Metabolic Diseases
OPRD1	Diarrhea	Pathological Conditions, Signs and Symptoms
OPRM1	Diarrhea	Pathological Conditions, Signs and Symptoms
CFTR	Diarrhea	Pathological Conditions, Signs and Symptoms
HTR3A	Diarrhea	Pathological Conditions, Signs and Symptoms
OPRK1	Diarrhea	Pathological Conditions, Signs and Symptoms
PTGS2	Dysmenorrhea	Pathological Conditions, Signs and Symptoms
PTGS1	Dysmenorrhea	Pathological Conditions, Signs and Symptoms
AKR1C3	Dysmenorrhea	Pathological Conditions, Signs and Symptoms
CHRM1	Dystonia	Nervous System Diseases
HTR1A	Dystonia	Nervous System Diseases
PTGS2	Endometriosis	Female Urogenital Diseases and Pregnancy Complications
MTOR	Endometriosis	Female Urogenital Diseases and Pregnancy Complications
ACHE	Epilepsy	Nervous System Diseases
SCN5A	Epilepsy	Nervous System Diseases
MAOA	Epilepsy	Nervous System Diseases
GABRB2	Epilepsy	Nervous System Diseases
ADRA1D	Erectile Dysfunction	Male Urogenital Diseases
DRD2	Erectile Dysfunction	Male Urogenital Diseases
DRD4	Erectile Dysfunction	Male Urogenital Diseases
TOP1	Esophageal Cancer	Neoplasms
LTA4H	Esophageal Cancer	Neoplasms
ESR2	Estrogen Deficiency	Female Urogenital Diseases and Pregnancy Complications
SLC6A4	Eye Diseases	Eye Diseases
ESR2	Eye Diseases	Eye Diseases
SLC6A2	Eye Diseases	Eye Diseases
ADRA2C	Eye Diseases	Eye Diseases
SLC6A4	Fibromyalgia	Nervous System Diseases
HTR2A	Fibromyalgia	Nervous System Diseases
SLC6A2	Fibromyalgia	Nervous System Diseases
ADRA2C	Fibromyalgia	Nervous System Diseases
HTR3A	Fibromyalgia	Nervous System Diseases
TOP1	Gastric Cancer	Digestive System Diseases
ALOX5	Gastrointestinal Cancers	Digestive System Diseases
ADRA1D	Glaucoma、Ocular Hypertension	Eye Diseases
CHRM4	Glaucoma、Ocular Hypertension	Eye Diseases
CHRM1	Glaucoma、Ocular Hypertension	Eye Diseases
ACHE	Glaucoma、Ocular Hypertension	Eye Diseases
DRD2	Glaucoma、Ocular Hypertension	Eye Diseases
HTR2A	Glaucoma、Ocular Hypertension	Eye Diseases
ADRB1	Glaucoma、Ocular Hypertension	Eye Diseases
SLC6A2	Glaucoma、Ocular Hypertension	Eye Diseases
ADRA1A	Glaucoma、Ocular Hypertension	Eye Diseases
CA4	Glaucoma、Ocular Hypertension	Eye Diseases
CHRM5	Glaucoma、Ocular Hypertension	Eye Diseases
CHRM2	Glaucoma、Ocular Hypertension	Eye Diseases
CA1	Glaucoma、Ocular Hypertension	Eye Diseases
CA2	Glaucoma、Ocular Hypertension	Eye Diseases
DRD1	Glaucoma、Ocular Hypertension	Eye Diseases
HSD11B1	Glaucoma、Ocular Hypertension	Eye Diseases
ADRA2C	Glaucoma、Ocular Hypertension	Eye Diseases
CHRM3	Glaucoma、Ocular Hypertension	Eye Diseases
ROCK2	Glaucoma、Ocular Hypertension	Eye Diseases
ADRB2	Glaucoma、Ocular Hypertension	Eye Diseases
ADRB1	Glaucoma、Ocular Hypertension	Eye Diseases
CHRNA2	Glaucoma、Ocular Hypertension	Eye Diseases
AKR1B1	Glaucoma、Ocular Hypertension	Eye Diseases
ADRB1	Heart Failure	Cardiovascular Diseases
SLC6A2	Heart Failure	Cardiovascular Diseases
CHRM2	Heart Failure	Cardiovascular Diseases
ADRA2C	Heart Failure	Cardiovascular Diseases
KCNH2	Heart Failure	Cardiovascular Diseases
ADRA1D	Heart Failure	Cardiovascular Diseases
DRD2	Heart Failure	Cardiovascular Diseases
VEGFA	Heart Failure	Cardiovascular Diseases
ADRA2B	Heart Failure	Cardiovascular Diseases
ADRA2A	Heart Failure	Cardiovascular Diseases
CA2	Heart Failure	Cardiovascular Diseases
MMP1	Hepatitis B	Virus Diseases
MMP2	Hepatitis B	Virus Diseases
MMP9	Hepatitis B	Virus Diseases
TLR4	Hepatitis B	Virus Diseases
ESR2	Hepatitis B	Virus Diseases
DRD2	Huntington's Chorea	Nervous System Diseases
ESR2	Hyperlipidemias	Nutritional and Metabolic Diseases
MAPK3	Hyperplasia	Pathological Conditions, Signs and Symptoms
MAPK1	Hyperplasia	Pathological Conditions, Signs and Symptoms
TLR4	Hypersensitivity	Immune System Diseases
DRD2	Hypersensitivity	Immune System Diseases
DRD5	Hypersensitivity	Immune System Diseases
ADRB1	Hypersensitivity	Immune System Diseases
CHRM5	Hypersensitivity	Immune System Diseases
ALOX5	Hypersensitivity	Immune System Diseases
DRD1	Hypersensitivity	Immune System Diseases
DRD4	Hypersensitivity	Immune System Diseases
ADRA1D	Hypertension	Cardiovascular Diseases
DRD2	Hypertension	Cardiovascular Diseases
HTR2A	Hypertension	Cardiovascular Diseases
ADRB1	Hypertension	Cardiovascular Diseases
ADRA1A	Hypertension	Cardiovascular Diseases
CHRM5	Hypertension	Cardiovascular Diseases
ADRA2B	Hypertension	Cardiovascular Diseases
PTGS2	Hypertension	Cardiovascular Diseases
NOS3	Hypertension	Cardiovascular Diseases
ADRA1B	Hypertension	Cardiovascular Diseases
ADRA2A	Hypertension	Cardiovascular Diseases
HTR1A	Hypertension	Cardiovascular Diseases
MAOB	Hypertension	Cardiovascular Diseases
CA2	Hypertension	Cardiovascular Diseases
DRD1	Hypertension	Cardiovascular Diseases
ADRA2C	Hypertension	Cardiovascular Diseases
ADRB2	Hypertension	Cardiovascular Diseases
CHRNA4	Hypertension	Cardiovascular Diseases
DRD2	Hypertension, Pulmonary	Respiratory Tract Diseases
NOS3	Hypertension, Pulmonary	Respiratory Tract Diseases
DPP4	Hypoglycemia	Nutritional and Metabolic Diseases
DRD2	Hypotension	Cardiovascular Diseases
NOS3	Hypotension	Cardiovascular Diseases
ADRA2C	Hypotension	Cardiovascular Diseases
CHRNA4	Hypotension	Cardiovascular Diseases
CHRM1	Inflammatory Bowel Diseases	Digestive System Diseases
OPRD1	Inflammatory Bowel Diseases	Digestive System Diseases
DRD2	Inflammatory Bowel Diseases	Digestive System Diseases
ESR2	Inflammatory Bowel Diseases	Digestive System Diseases
TBXAS1	Inflammatory Bowel Diseases	Digestive System Diseases
ALOX5	Inflammatory Bowel Diseases	Digestive System Diseases
PTGS2	Inflammatory Bowel Diseases	Digestive System Diseases
PTGS1	Inflammatory Bowel Diseases	Digestive System Diseases
OPRK1	Inflammatory Bowel Diseases	Digestive System Diseases
CHRM1	Intestinal Syndrome	Digestive System Diseases
CHRM5	Intestinal Syndrome	Digestive System Diseases
HTR3A	Intestinal Syndrome	Digestive System Diseases
CHRM1	Irritable Bowel Syndrome	Digestive System Diseases
OPRD1	Irritable Bowel Syndrome	Digestive System Diseases
OPRM1	Irritable Bowel Syndrome	Digestive System Diseases
OPRK1	Irritable Bowel Syndrome	Digestive System Diseases
OPRD1	Ischemic Feart Disease	Cardiovascular Diseases
ITGA2B	Ischemic Feart Disease	Cardiovascular Diseases
TBXAS1	Ischemic Feart Disease	Cardiovascular Diseases
ADRA2B	Ischemic Feart Disease	Cardiovascular Diseases
ADRA2A	Ischemic Feart Disease	Cardiovascular Diseases
MTOR	Kidney Cancer	Neoplasms
VEGFA	Lateral Sclerosis	Nervous System Diseases
BCL2	Lateral Sclerosis	Nervous System Diseases
HTR1A	Lateral Sclerosis	Nervous System Diseases
BCL2	Leukemia	Neoplasms
ALOX5	Leukemia	Neoplasms
DHFR	Leukemia	Neoplasms
TOP1	Leukemia	Neoplasms
LTA4H	Leukemia	Neoplasms
DRD2	Lung Cancer	Neoplasms
OPRM1	Lung Cancer	Neoplasms
BCL2	Lung Cancer	Neoplasms
PTGS2	Lung Cancer	Neoplasms
MMP1	Lung Cancer	Neoplasms
MMP2	Lung Cancer	Neoplasms
TUBB1	Lung Cancer	Neoplasms
TOP1	Lung Cancer	Neoplasms
MMP9	Lung Cancer	Neoplasms
MTOR	Lung Cancer	Neoplasms
CHRNA3	Lung Cancer	Neoplasms
RXRA	Lymphoma	Neoplasms
HTR2C	Lymphoma	Neoplasms
HTR1A	Lymphoma	Neoplasms
DHFR	Lymphoma	Neoplasms
TOP1	Lymphoma	Neoplasms
MTOR	Lymphoma	Neoplasms
APP	Macular Degeneration	Eye Diseases
VEGFA	Macular Degeneration	Eye Diseases
KCNH2	Malaria	Parasitic Diseases
DHFR	Malaria	Parasitic Diseases
TLR4	Melanoma	Neoplasms
BCL2	Melanoma	Neoplasms
PLAU	Melanoma	Neoplasms
RAF1	Melanoma	Neoplasms
SIGMAR1	Melanoma	Neoplasms
DPP4	Metabolic Disorder	Nutritional and Metabolic Diseases
HTR2C	Metabolic Disorder	Nutritional and Metabolic Diseases
CA14	Metabolic Disorder	Nutritional and Metabolic Diseases
HSD11B1	Metabolic Disorder	Nutritional and Metabolic Diseases
SCD	Metabolic Disorder	Nutritional and Metabolic Diseases
OPRD1	Migraine Disorders	Nervous System Diseases
SLC6A4	Migraine Disorders	Nervous System Diseases
DRD2	Migraine Disorders	Nervous System Diseases
OPRM1	Migraine Disorders	Nervous System Diseases
SLC6A2	Migraine Disorders	Nervous System Diseases
TRPV1	Migraine Disorders	Nervous System Diseases
HTR2A	Migraine Disorders	Nervous System Diseases
ADRB1	Migraine Disorders	Nervous System Diseases
HTR2C	Migraine Disorders	Nervous System Diseases
HTR1A	Migraine Disorders	Nervous System Diseases
SCN5A	Migraine Disorders	Nervous System Diseases
DRD2	Mood Disorder	Mental Disorders
SLC6A2	Mood Disorder	Mental Disorders
DRD3	Mood Disorder	Mental Disorders
HTR1A	Mood Disorder	Mental Disorders
SLC6A4	Mood Disorder	Mental Disorders
HTR2A	Mood Disorder	Mental Disorders
HTR2C	Mood Disorder	Mental Disorders
MAOA	Mood Disorder	Mental Disorders
SLC6A3	Mood Disorder	Mental Disorders
SIGMAR1	Mood Disorder	Mental Disorders
CHRNA7	Mood Disorder	Mental Disorders
OPRK1	Mood Disorder	Mental Disorders
ACHE	Motor Neuron Disease	Nervous System Diseases
KCNH2	Multiple Sclerosis	Nervous System Diseases
MMP1	Multiple Sclerosis	Nervous System Diseases
MMP2	Multiple Sclerosis	Nervous System Diseases
ADRB2	Multiple Sclerosis	Nervous System Diseases
ACHE	Myasthenia Gravis	Immune System Diseases
ADRB2	Myasthenia Gravis	Immune System Diseases
PTGS2	Myocardial Infarction	Cardiovascular Diseases
NOS3	Myocardial Infarction	Cardiovascular Diseases
PLAU	Myocardial Infarction	Cardiovascular Diseases
MMP1	Myocardial Infarction	Cardiovascular Diseases
F2	Myocardial Infarction	Cardiovascular Diseases
LTA4H	Myocardial Infarction	Cardiovascular Diseases
CHRM1	Neuralgia	Pathological Conditions, Signs and Symptoms
SLC6A4	Neuralgia	Pathological Conditions, Signs and Symptoms
SLC6A2	Neuralgia	Pathological Conditions, Signs and Symptoms
ADRA2B	Neuralgia	Pathological Conditions, Signs and Symptoms
PTGS2	Neuralgia	Pathological Conditions, Signs and Symptoms
MAOB	Neuralgia	Pathological Conditions, Signs and Symptoms
MAOA	Neuralgia	Pathological Conditions, Signs and Symptoms
TRPV1	Neuralgia	Pathological Conditions, Signs and Symptoms
AKR1BA	Neuralgia	Pathological Conditions, Signs and Symptoms
MAPK3	Neurodegenerative Diseases	Nervous System Diseases
ESR2	Neurodegenerative Diseases	Nervous System Diseases
MAPK1	Neurodegenerative Diseases	Nervous System Diseases
OPRK1	Neurodegenerative Diseases	Nervous System Diseases
SLC6A2	Neuroendocrine Tumors	Neoplasms
CHRM1	Neurological Disease	Nervous System Diseases
SLC6A4	Neurological Disease	Nervous System Diseases
DRD2	Neurological Disease	Nervous System Diseases
HTR2A	Neurological Disease	Nervous System Diseases
SIGMAR1	Neurological Disease	Nervous System Diseases
MAOB	Neurological Disease	Nervous System Diseases
CHRNA7	Neurological Disease	Nervous System Diseases
SLC6A4	Obesity	Nutritional and Metabolic Diseases
OPRM1	Obesity	Nutritional and Metabolic Diseases
ADRB1	Obesity	Nutritional and Metabolic Diseases
SLC6A2	Obesity	Nutritional and Metabolic Diseases
METAP2	Obesity	Nutritional and Metabolic Diseases
HTR2C	Obesity	Nutritional and Metabolic Diseases
ADRA1B	Obesity	Nutritional and Metabolic Diseases
ADRA2A	Obesity	Nutritional and Metabolic Diseases
MAOB	Obesity	Nutritional and Metabolic Diseases
ADRA2C	Obesity	Nutritional and Metabolic Diseases
SLC6A3	Obesity	Nutritional and Metabolic Diseases
ADRB2	Obesity	Nutritional and Metabolic Diseases
HSD11B1	Obesity	Nutritional and Metabolic Diseases
OPRK1	Obesity	Nutritional and Metabolic Diseases
KCNH2	Ovarian Cancer	Neoplasms
MMP2	Ovarian Cancer	Neoplasms
TOP1	Ovarian Cancer	Neoplasms
KCNH2	Pain, Procedural	Pathological Conditions, Signs and Symptoms
ADRA1D	Pain, Procedural	Pathological Conditions, Signs and Symptoms
ACHE	Pain, Procedural	Pathological Conditions, Signs and Symptoms
CHRM5	Pain, Procedural	Pathological Conditions, Signs and Symptoms
CHRM2	Pain, Procedural	Pathological Conditions, Signs and Symptoms
SIGMAR1	Pain, Procedural	Pathological Conditions, Signs and Symptoms
OPRK1	Pain, Procedural	Pathological Conditions, Signs and Symptoms
F3	Pancreatic Cancer	Neoplasms
ALOX5	Pancreatic Cancer	Neoplasms
MMP1	Pancreatic Cancer	Neoplasms
MMP2	Pancreatic Cancer	Neoplasms
MTOR	Pancreatic Cancer	Neoplasms
SIGMAR1	Pancreatic Cancer	Neoplasms
DRD2	Paranoid Disorders	Mental Disorders
ACHE	Parasitic Diseases	Parasitic Diseases
VEGFA	Parasitic Diseases	Parasitic Diseases
CHRM4	Parkinson	Nervous System Diseases
CHRM1	Parkinson	Nervous System Diseases
ACHE	Parkinson	Nervous System Diseases
SLC6A4	Parkinson	Nervous System Diseases
DRD2	Parkinson	Nervous System Diseases
HTR2A	Parkinson	Nervous System Diseases
CHRM5	Parkinson	Nervous System Diseases
CHRM2	Parkinson	Nervous System Diseases
DRD3	Parkinson	Nervous System Diseases
HTR1A	Parkinson	Nervous System Diseases
MAOB	Parkinson	Nervous System Diseases
MAOA	Parkinson	Nervous System Diseases
DRD1	Parkinson	Nervous System Diseases
SLC6A3	Parkinson	Nervous System Diseases
RAF1	Parkinson	Nervous System Diseases
DRD4	Parkinson	Nervous System Diseases
CHRNA7	Parkinson	Nervous System Diseases
ACHE	Poisoning	Chemically-Induced Disorders
CHRM5	Poisoning	Chemically-Induced Disorders
ADRA2C	Poisoning	Chemically-Induced Disorders
OPRD1	Premature Ejaculation	Male Urogenital Diseases
SLC6A4	Premature Ejaculation	Male Urogenital Diseases
HTR1A	Premature Ejaculation	Male Urogenital Diseases
ADRB2	Premature Ejaculation	Male Urogenital Diseases
GABRB2	Premenstrual Syndrome	Pathological Conditions, Signs and Symptoms
ADRA2C	Prostatic Diseases	Male Urogenital Diseases
ADRA1D	Prostatic Hyperplasia	Male Urogenital Diseases
DRD2	Prostatic Hyperplasia	Male Urogenital Diseases
ESR2	Prostatic Hyperplasia	Male Urogenital Diseases
ADRA1A	Prostatic Hyperplasia	Male Urogenital Diseases
TLR4	Prostatic Neoplasms	Male Urogenital Diseases
RXRA	Prostatic Neoplasms	Male Urogenital Diseases
ESR2	Prostatic Neoplasms	Male Urogenital Diseases
ADRA1A	Prostatic Neoplasms	Male Urogenital Diseases
BCL2	Prostatic Neoplasms	Male Urogenital Diseases
PTGS2	Prostatic Neoplasms	Male Urogenital Diseases
MMP1	Prostatic Neoplasms	Male Urogenital Diseases
MMP2	Prostatic Neoplasms	Male Urogenital Diseases
SIGMAR1	Prostatic Neoplasms	Male Urogenital Diseases
AKR1C3	Prostatic Neoplasms	Male Urogenital Diseases
CHRM1	Psychotic Disorders	Mental Disorders
DRD2	Psychotic Disorders	Mental Disorders
HTR2A	Psychotic Disorders	Mental Disorders
HTR1A	Psychotic Disorders	Mental Disorders
CHRM1	Pulmonary Disease, Chronic Obstructive	Respiratory Tract Diseases
DRD2	Pulmonary Disease, Chronic Obstructive	Respiratory Tract Diseases
CHRM5	Pulmonary Disease, Chronic Obstructive	Respiratory Tract Diseases
ALOX5	Pulmonary Disease, Chronic Obstructive	Respiratory Tract Diseases
CHRM2	Pulmonary Disease, Chronic Obstructive	Respiratory Tract Diseases
CHRM3	Pulmonary Disease, Chronic Obstructive	Respiratory Tract Diseases
ROCK2	Pulmonary Disease, Chronic Obstructive	Respiratory Tract Diseases
ADRB2	Pulmonary Disease, Chronic Obstructive	Respiratory Tract Diseases
F3	Respiratory Distress Syndrome	Respiratory Tract Diseases
ALOX5	Respiratory Distress Syndrome	Respiratory Tract Diseases
ADRB2	Respiratory Distress Syndrome	Respiratory Tract Diseases
MAPK3	Restenosis	Cardiovascular Diseases
ITGA2B	Restenosis	Cardiovascular Diseases
NOS2	Restenosis	Cardiovascular Diseases
MAPK1	Restenosis	Cardiovascular Diseases
MTOR	Restenosis	Cardiovascular Diseases
OPRK1	Restenosis	Cardiovascular Diseases
ALOX5	Rhinitis, Allergic	Respiratory Tract Diseases
ADRA2C	Rhinitis, Allergic	Respiratory Tract Diseases
CHRM1	Schizophrenia	Mental Disorders
SLC6A4	Schizophrenia	Mental Disorders
DRD2	Schizophrenia	Mental Disorders
HTR2A	Schizophrenia	Mental Disorders
DRD5	Schizophrenia	Mental Disorders
HTR2C	Schizophrenia	Mental Disorders
CHRM5	Schizophrenia	Mental Disorders
DRD3	Schizophrenia	Mental Disorders
HTR1A	Schizophrenia	Mental Disorders
DRD1	Schizophrenia	Mental Disorders
DRD4	Schizophrenia	Mental Disorders
SIGMAR1	Schizophrenia	Mental Disorders
CHRNA7	Schizophrenia	Mental Disorders
TLR4	Sepsis	Bacterial Infections and Mycoses
F3	Sepsis	Bacterial Infections and Mycoses
ADRB1	Sepsis	Bacterial Infections and Mycoses
ESR2	Sepsis	Bacterial Infections and Mycoses
TLR4	Shock	Pathological Conditions, Signs and Symptoms
ADRB1	Shock	Pathological Conditions, Signs and Symptoms
SLC6A4	Sleep Wake Disorders	Nervous System Diseases
DRD2	Sleep Wake Disorders	Nervous System Diseases
HTR2A	Sleep Wake Disorders	Nervous System Diseases
HTR2C	Sleep Wake Disorders	Nervous System Diseases
HTR1A	Sleep Wake Disorders	Nervous System Diseases
CA2	Sleep Wake Disorders	Nervous System Diseases
GABRB2	Sleep Wake Disorders	Nervous System Diseases
VEGFA	Solid Tumours	Neoplasms
METAP2	Solid Tumours	Neoplasms
BCL2	Solid Tumours	Neoplasms
CHRM5	Solid Tumours	Neoplasms
PLAU	Solid Tumours	Neoplasms
MAPK1	Solid Tumours	Neoplasms
MMP2	Solid Tumours	Neoplasms
TUBB1	Solid Tumours	Neoplasms
TOP1	Solid Tumours	Neoplasms
RAF1	Solid Tumours	Neoplasms
F2	Solid Tumours	Neoplasms
MMP9	Solid Tumours	Neoplasms
MTOR	Solid Tumours	Neoplasms
MAPK3	Solid Tumours	Neoplasms
TOP2A	Solid Tumours	Neoplasms
DRD5	Solid Tumours	Neoplasms
CCND1	Solid Tumours	Neoplasms
LTA4H	Solid Tumours	Neoplasms
CHRM1	Spasm	Nervous System Diseases
CHRM5	Spasm	Nervous System Diseases
ALOX5	Spasm	Nervous System Diseases
HTR1A	Spasm	Nervous System Diseases
GABRB2	Spasm	Nervous System Diseases
CHRM3	Spasm	Nervous System Diseases
CHRNA2	Spasm	Nervous System Diseases
PTGS2	Stroke	Nervous System Diseases
F2	Stroke	Nervous System Diseases
MMP9	Stroke	Nervous System Diseases
ADRB2	Stroke	Nervous System Diseases
OPRD1	Substance-Related Disorders	Chemically-Induced Disorders
DRD2	Substance-Related Disorders	Chemically-Induced Disorders
OPRM1	Substance-Related Disorders	Chemically-Induced Disorders
CHRM5	Substance-Related Disorders	Chemically-Induced Disorders
DRD3	Substance-Related Disorders	Chemically-Induced Disorders
OPRK1	Substance-Related Disorders	Chemically-Induced Disorders
ITGA2B	Thrombosis	Cardiovascular Diseases
F3	Thrombosis	Cardiovascular Diseases
TBXAS1	Thrombosis	Cardiovascular Diseases
ALOX5	Thrombosis	Cardiovascular Diseases
PLAU	Thrombosis	Cardiovascular Diseases
F2	Thrombosis	Cardiovascular Diseases
CHRM1	Ulcer	Pathological Conditions, Signs and Symptoms
VEGFA	Ulcer	Pathological Conditions, Signs and Symptoms
CHRM5	Ulcer	Pathological Conditions, Signs and Symptoms
CHRM2	Ulcer	Pathological Conditions, Signs and Symptoms
CA1	Ulcer	Pathological Conditions, Signs and Symptoms
CA2	Ulcer	Pathological Conditions, Signs and Symptoms
SIGMAR1	Ulcer	Pathological Conditions, Signs and Symptoms
CHRM1	Urinary Bladder Diseases	Male Urogenital Diseases
OPRD1	Urinary Bladder Diseases	Male Urogenital Diseases
CHRM5	Urinary Bladder Diseases	Male Urogenital Diseases
CHRM2	Urinary Bladder Diseases	Male Urogenital Diseases
CHRM3	Urinary Bladder Diseases	Male Urogenital Diseases
TRPV1	Urinary Bladder Diseases	Male Urogenital Diseases
ADRB2	Urinary Bladder Diseases	Male Urogenital Diseases
ADRA1D	Urinary Incontinence	Pathological Conditions, Signs and Symptoms
CHRM1	Urinary Incontinence	Pathological Conditions, Signs and Symptoms
OPRD1	Urinary Incontinence	Pathological Conditions, Signs and Symptoms
OPRM1	Urinary Incontinence	Pathological Conditions, Signs and Symptoms
ADRA1A	Urinary Incontinence	Pathological Conditions, Signs and Symptoms
SCN5A	Urinary Incontinence	Pathological Conditions, Signs and Symptoms
CHRM2	Urinary Incontinence	Pathological Conditions, Signs and Symptoms
ADRA1B	Urinary Incontinence	Pathological Conditions, Signs and Symptoms
HTR1A	Urinary Incontinence	Pathological Conditions, Signs and Symptoms
CHRM3	Urinary Incontinence	Pathological Conditions, Signs and Symptoms
TRPV1	Urinary Incontinence	Pathological Conditions, Signs and Symptoms
TLR4	Ventricular Dysfunction	Cardiovascular Diseases
MAOB	Vitiligo	Skin and Connective Tissue Diseases
MAOA	Vitiligo	Skin and Connective Tissue Diseases
SLC6A4	Vomiting	Pathological Conditions, Signs and Symptoms
DRD2	Vomiting	Pathological Conditions, Signs and Symptoms
DRD3	Vomiting	Pathological Conditions, Signs and Symptoms
HTR3A	Vomiting	Pathological Conditions, Signs and Symptoms
CHRM3	Vomiting	Pathological Conditions, Signs and Symptoms
