# Supplementary material for: Jiawei Foshou San Induces Apoptosis in Ectopic Endometrium Based on Systems Pharmacology, Molecular Docking, and Experimental Evidence
Source: Evid Based Complement Alternat Med. 2019 Oct 27;2019:2360367. doi: 10.1155/2019/2360367 (PMC6855060; doi:10.1155/2019/2360367)
Supplement: Supplementary Materials — Table S1: detailed information on targets for JFS compounds. Table S2: detailed information on pharmacological targets of FDA-approved drugs. Table S3: 99 common targets between JFS targets and FDA-approved drug targets. Table S4: detailed information on common target-diseases and disease classification. Table S5: GO analysis and KEGG pathway enrichment of 99 common targets from DAVID. [file 2360367.f1.zip › 2360367.f1/Table S5 GO analysis and pathway enrichment.xlsx]

## Sheet: BP
biological process
Term	Count	%	P-Value
intracellular signaling cascade	36	42.9	3.9e-16
cell surface receptor linked signal transduction	35	41.7	2.5e-10
neurological system process	27	32.1	2.8e-09
G-protein coupled receptor protein signaling pathway	26	31	3.1e-09
cell-cell signaling	24	28.6	3.2e-13
regulation of cell proliferation	24	28.6	8.2e-11
regulation of system process	22	26.2	4.9e-17
behavior	22	26.2	2.1e-13
response to organic substance	22	26.2	7e-10
positive regulation of molecular function	21	25	1.2e-10
second-messenger-mediated signaling	20	23.8	7.5e-17
positive regulation of catalytic activity	20	23.8	1.2e-10
transmission of nerve impulse	19	22.6	1.4e-12
response to endogenous stimulus	19	22.6	1.7e-11
positive regulation of multicellular organismal process	18	21.4	4.8e-14
synaptic transmission	18	21.4	1.2e-12
G-protein signaling, coupled to cyclic nucleotide second messenger	16	19	1.4e-16
cyclic-nucleotide-mediated signaling	16	19	9.1e-16
positive regulation of cell proliferation	16	19	1.6e-08
regulation of phosphorylation	16	19	7.7e-08
regulation of phosphorus metabolic process	16	19	1.3e-07
regulation of phosphate metabolic process	16	19	1.3e-07
homeostatic process	16	19	2.9e-05
phosphorylation	16	19	6e-05
phosphorus metabolic process	16	19	0.00051
phosphate metabolic process	16	19	0.00051
G-protein signaling, coupled to cAMP nucleotide second messenger	15	17.9	5.2e-17
cAMP-mediated signaling	15	17.9	2.6e-16
blood circulation	15	17.9	3.6e-12
circulatory system process	15	17.9	3.6e-12
protein amino acid phosphorylation	15	17.9	3.2e-05
regulation of apoptosis	15	17.9	0.00024
regulation of programmed cell death	15	17.9	0.00026
regulation of cell death	15	17.9	0.00027
positive regulation of macromolecule metabolic process	15	17.9	0.00045
cognition	15	17.9	0.00081
regulation of cyclase activity	14	16.7	1.6e-14
regulation of lyase activity	14	16.7	2.1e-14
regulation of cyclic nucleotide biosynthetic process	14	16.7	6.6e-14
regulation of nucleotide biosynthetic process	14	16.7	6.6e-14
regulation of cyclic nucleotide metabolic process	14	16.7	9.4e-14
regulation of nucleotide metabolic process	14	16.7	1.3e-13
response to organic cyclic substance	14	16.7	2.3e-13
regulation of response to external stimulus	14	16.7	8e-12
negative regulation of multicellular organismal process	14	16.7	1.2e-11
negative regulation of molecular function	14	16.7	7.1e-08
response to hormone stimulus	14	16.7	2.1e-07
response to abiotic stimulus	14	16.7	2.2e-07
regulation of adenylate cyclase activity	13	15.5	3.3e-13
regulation of cAMP biosynthetic process	13	15.5	6.1e-13
regulation of cAMP metabolic process	13	15.5	7.7e-13
response to drug	13	15.5	4.7e-09
negative regulation of catalytic activity	13	15.5	7.5e-08
regulation of protein kinase activity	13	15.5	7.9e-07
regulation of kinase activity	13	15.5	1.1e-06
regulation of transferase activity	13	15.5	1.8e-06
cell proliferation	13	15.5	8.9e-06
positive regulation of biosynthetic process	13	15.5	0.00074
response to steroid hormone stimulus	12	14.3	1.6e-08
regulation of locomotion	12	14.3	1.6e-08
locomotory behavior	12	14.3	5.9e-07
protein kinase cascade	12	14.3	1.1e-05
chemical homeostasis	12	14.3	0.0002
positive regulation of cellular biosynthetic process	12	14.3	0.0022
response to organic nitrogen	11	13.1	2.9e-12
regulation of blood pressure	11	13.1	3.3e-10
negative regulation of cell communication	11	13.1	1.9e-06
regulation of hydrolase activity	11	13.1	2.8e-05
defense response	11	13.1	0.0033
positive regulation of macromolecule biosynthetic process	11	13.1	0.005
regulation of heart contraction	10	11.9	6.5e-10
regulation of ion transport	10	11.9	6.3e-09
learning or memory	10	11.9	1.7e-08
negative regulation of transport	10	11.9	9.6e-08
regulation of neurological system process	10	11.9	2.8e-07
regulation of secretion	10	11.9	2.9e-06
regulation of cellular localization	10	11.9	1.5e-05
cellular ion homeostasis	10	11.9	0.00035
cellular chemical homeostasis	10	11.9	0.0004
ion homeostasis	10	11.9	0.00067
positive regulation of apoptosis	10	11.9	0.00096
positive regulation of programmed cell death	10	11.9	0.001
positive regulation of cell death	10	11.9	0.001
cellular homeostasis	10	11.9	0.0017
response to wounding	10	11.9	0.004
positive regulation of nucleobase, nucleoside, nucleotide and nucleic acid metabolic process	10	11.9	0.011
oxidation reduction	10	11.9	0.013
positive regulation of nitrogen compound metabolic process	10	11.9	0.014
ion transport	10	11.9	0.037
response to alkaloid	9	10.7	8.7e-10
negative regulation of adenylate cyclase activity	9	10.7	1e-09
negative regulation of lyase activity	9	10.7	1e-09
negative regulation of cyclase activity	9	10.7	1e-09
response to ethanol	9	10.7	3.5e-09
regulation of metal ion transport	9	10.7	2.4e-08
regulation of synaptic transmission	9	10.7	1.3e-06
regulation of transmission of nerve impulse	9	10.7	2.4e-06
positive regulation of hydrolase activity	9	10.7	1e-05
cellular calcium ion homeostasis	9	10.7	1.2e-05
calcium ion homeostasis	9	10.7	1.5e-05
cellular metal ion homeostasis	9	10.7	2e-05
metal ion homeostasis	9	10.7	2.8e-05
cellular di-, tri-valent inorganic cation homeostasis	9	10.7	5.7e-05
di-, tri-valent inorganic cation homeostasis	9	10.7	8.2e-05
cellular cation homeostasis	9	10.7	0.00012
cation homeostasis	9	10.7	0.00028
regulation of growth	9	10.7	0.0009
negative regulation of cell proliferation	9	10.7	0.0013
cell motion	9	10.7	0.0069
cell death	9	10.7	0.062
death	9	10.7	0.064
regulation of systemic arterial blood pressure	8	9.5	1.1e-09
response to amine stimulus	8	9.5	2.6e-09
multicellular organismal response to stress	8	9.5	2.6e-09
inhibition of adenylate cyclase activity by G-protein signaling	8	9.5	3.1e-09
vascular process in circulatory system	8	9.5	4.6e-08
regulation of multicellular organism growth	8	9.5	6.5e-08
regulation of calcium ion transport	8	9.5	1.6e-07
multicellular organismal homeostasis	8	9.5	6.6e-07
adult behavior	8	9.5	7.1e-07
phosphoinositide-mediated signaling	8	9.5	8.4e-07
biogenic amine metabolic process	8	9.5	1.6e-06
negative regulation of response to stimulus	8	9.5	2e-06
response to estrogen stimulus	8	9.5	2.8e-06
response to light stimulus	8	9.5	1.7e-05
cellular amino acid derivative metabolic process	8	9.5	5.5e-05
muscle system process	8	9.5	6e-05
regulation of cell migration	8	9.5	6.2e-05
growth	8	9.5	0.0001
regulation of cell motion	8	9.5	0.00014
response to radiation	8	9.5	0.00018
response to inorganic substance	8	9.5	0.00021
positive regulation of protein kinase activity	8	9.5	0.00034
positive regulation of transport	8	9.5	0.00034
positive regulation of kinase activity	8	9.5	0.00043
positive regulation of transferase activity	8	9.5	0.00054
positive regulation of cell communication	8	9.5	0.0033
regulation of cellular protein metabolic process	8	9.5	0.022
positive regulation of transcription	8	9.5	0.049
positive regulation of gene expression	8	9.5	0.056
programmed cell death	8	9.5	0.069
response to tropane	7	8.3	9e-10
response to cocaine	7	8.3	9e-10
negative regulation of ion transport	7	8.3	3.3e-09
regulation of systemic arterial blood pressure mediated by a chemical signal	7	8.3	9.5e-09
regulation of amine transport	7	8.3	3.4e-08
regulation of behavior	7	8.3	2.7e-07
activation of phospholipase C activity by G-protein coupled receptor protein signaling pathway coupled to IP3 second messenger	7	8.3	5.8e-07
regulation of blood vessel size	7	8.3	6.5e-07
regulation of tube size	7	8.3	6.5e-07
positive regulation of cyclase activity	7	8.3	1e-06
positive regulation of lyase activity	7	8.3	1.2e-06
activation of phospholipase C activity	7	8.3	2.2e-06
positive regulation of phospholipase C activity	7	8.3	2.2e-06
positive regulation of phospholipase activity	7	8.3	3.2e-06
regulation of phospholipase activity	7	8.3	3.7e-06
positive regulation of lipase activity	7	8.3	5.1e-06
regulation of lipase activity	7	8.3	1.2e-05
positive regulation of locomotion	7	8.3	2.4e-05
aging	7	8.3	4.6e-05
one-carbon metabolic process	7	8.3	5.1e-05
response to metal ion	7	8.3	0.00011
response to hypoxia	7	8.3	0.00014
response to oxygen levels	7	8.3	0.00018
muscle contraction	7	8.3	0.00029
response to peptide hormone stimulus	7	8.3	0.0003
positive regulation of cellular protein metabolic process	7	8.3	0.0025
positive regulation of protein metabolic process	7	8.3	0.0031
blood vessel development	7	8.3	0.0033
vasculature development	7	8.3	0.0037
positive regulation of developmental process	7	8.3	0.006
lipid biosynthetic process	7	8.3	0.012
neuron development	7	8.3	0.015
positive regulation of transcription from RNA polymerase II promoter	7	8.3	0.022
neuron differentiation	7	8.3	0.045
positive regulation of transcription, DNA-dependent	7	8.3	0.063
positive regulation of RNA metabolic process	7	8.3	0.065
multicellular organism reproduction	7	8.3	0.068
reproductive process in a multicellular organism	7	8.3	0.068
negative regulation of calcium ion transport	6	7.1	4.9e-09
dopamine receptor signaling pathway	6	7.1	5.1e-08
response to amphetamine	6	7.1	6.9e-08
fear response	6	7.1	6.9e-08
dopamine metabolic process	6	7.1	9.2e-08
temperature homeostasis	6	7.1	1.2e-07
negative regulation of synaptic transmission	6	7.1	1.2e-07
negative regulation of blood pressure	6	7.1	2e-07
negative regulation of transmission of nerve impulse	6	7.1	3.1e-07
visual learning	6	7.1	4.6e-07
negative regulation of neurological system process	6	7.1	5.6e-07
visual behavior	6	7.1	9.6e-07
diol metabolic process	6	7.1	1.6e-06
catecholamine metabolic process	6	7.1	1.6e-06
catechol metabolic process	6	7.1	1.6e-06
phenol metabolic process	6	7.1	1.8e-06
regulation of adenylate cyclase activity involved in G-protein signaling	6	7.1	3.6e-06
activation of adenylate cyclase activity by G-protein signaling pathway	6	7.1	3.6e-06
positive regulation of adenylate cyclase activity by G-protein signaling pathway	6	7.1	3.6e-06
negative regulation of response to external stimulus	6	7.1	1.1e-05
activation of adenylate cyclase activity	6	7.1	1.8e-05
positive regulation of adenylate cyclase activity	6	7.1	1.9e-05
learning	6	7.1	2.7e-05
regulation of muscle contraction	6	7.1	6.5e-05
response to glucocorticoid stimulus	6	7.1	9.6e-05
response to corticosteroid stimulus	6	7.1	0.00014
positive regulation of protein amino acid phosphorylation	6	7.1	0.00018
positive regulation of cell migration	6	7.1	0.00018
positive regulation of phosphorylation	6	7.1	0.00027
positive regulation of cell motion	6	7.1	0.00028
positive regulation of phosphate metabolic process	6	7.1	0.00031
positive regulation of phosphorus metabolic process	6	7.1	0.00031
regulation of homeostatic process	6	7.1	0.00057
rhythmic process	6	7.1	0.00096
response to nutrient	6	7.1	0.0014
regulation of MAP kinase activity	6	7.1	0.0015
response to oxidative stress	6	7.1	0.0028
regulation of protein amino acid phosphorylation	6	7.1	0.0036
MAPKKK cascade	6	7.1	0.0047
positive regulation of protein modification process	6	7.1	0.005
response to nutrient levels	6	7.1	0.0062
blood vessel morphogenesis	6	7.1	0.0082
posttranscriptional regulation of gene expression	6	7.1	0.0082
response to extracellular stimulus	6	7.1	0.0097
regulation of protein kinase cascade	6	7.1	0.016
reproductive developmental process	6	7.1	0.019
cell migration	6	7.1	0.024
positive regulation of signal transduction	6	7.1	0.03
regulation of protein modification process	6	7.1	0.03
cell motility	6	7.1	0.035
localization of cell	6	7.1	0.035
skeletal system development	6	7.1	0.04
inflammatory response	6	7.1	0.043
regulation of cell cycle	6	7.1	0.046
cell projection organization	6	7.1	0.067
regulation of systemic arterial blood pressure by norepinephrine-epinephrine	5	6	3.9e-08
behavioral response to cocaine	5	6	7.8e-08
regulation of synaptic transmission, dopaminergic	5	6	2.3e-07
regulation of potassium ion transport	5	6	2.3e-07
muscarinic acetylcholine receptor signaling pathway	5	6	3.6e-07
monoamine transport	5	6	2.5e-06
regulation of neurotransmitter transport	5	6	1.5e-05
nerve-nerve synaptic transmission	5	6	3.2e-05
smooth muscle contraction	5	6	4.1e-05
regulation of vasoconstriction	5	6	4.6e-05
behavioral interaction between organisms	5	6	5.2e-05
regulation of blood coagulation	5	6	5.8e-05
regulation of smooth muscle contraction	5	6	7.2e-05
regulation of coagulation	5	6	9.7e-05
adult locomotory behavior	5	6	0.00029
tissue remodeling	5	6	0.00033
negative regulation of locomotion	5	6	0.00046
neuromuscular process	5	6	0.00049
feeding behavior	5	6	0.00073
regeneration	5	6	0.00073
amine catabolic process	5	6	0.0012
response to temperature stimulus	5	6	0.0015
developmental maturation	5	6	0.003
positive regulation of MAP kinase activity	5	6	0.0031
Ras protein signal transduction	5	6	0.0034
amine transport	5	6	0.0052
regulation of protein localization	5	6	0.009
lipid transport	5	6	0.011
forebrain development	5	6	0.013
carboxylic acid biosynthetic process	5	6	0.013
organic acid biosynthetic process	5	6	0.013
lipid localization	5	6	0.014
extracellular structure organization	5	6	0.016
response to bacterium	5	6	0.027
axonogenesis	5	6	0.027
fatty acid metabolic process	5	6	0.03
regulation of cell size	5	6	0.034
anti-apoptosis	5	6	0.034
cell morphogenesis involved in neuron differentiation	5	6	0.035
neuron projection morphogenesis	5	6	0.037
tube development	5	6	0.041
negative regulation of signal transduction	5	6	0.042
positive regulation of response to stimulus	5	6	0.051
cell morphogenesis involved in differentiation	5	6	0.056
cell projection morphogenesis	5	6	0.057
neuron projection development	5	6	0.065
cell part morphogenesis	5	6	0.065
regulation of cellular component size	5	6	0.077
regulation of dopamine uptake	4	4.8	2e-06
regulation of catecholamine uptake during transmission of nerve impulse	4	4.8	2e-06
activation of adenylate cyclase activity by dopamine receptor signaling pathway	4	4.8	3.9e-06
regulation of neurotransmitter uptake	4	4.8	3.9e-06
negative regulation of ion transmembrane transporter activity	4	4.8	1.1e-05
catecholamine transport	4	4.8	1.6e-05
prepulse inhibition	4	4.8	2.3e-05
positive regulation of multicellular organismal metabolic process	4	4.8	5.5e-05
positive regulation of vasoconstriction	4	4.8	5.5e-05
negative regulation of transporter activity	4	4.8	6.9e-05
organ growth	4	4.8	6.9e-05
behavioral defense response	4	4.8	8.6e-05
behavioral fear response	4	4.8	8.6e-05
response to corticosterone stimulus	4	4.8	0.00011
startle response	4	4.8	0.00011
regulation of protein kinase B signaling cascade	4	4.8	0.00013
regulation of multicellular organismal metabolic process	4	4.8	0.00013
regulation of catecholamine secretion	4	4.8	0.00018
regulation of synaptic transmission, glutamatergic	4	4.8	0.00018
response to mineralocorticoid stimulus	4	4.8	0.00021
positive regulation of blood pressure	4	4.8	0.00032
blood vessel remodeling	4	4.8	0.00032
regulation of ion transmembrane transporter activity	4	4.8	0.00037
regulation of ion transmembrane transport	4	4.8	0.00042
organic alcohol transport	4	4.8	0.00042
regulation of transmembrane transporter activity	4	4.8	0.00047
regulation of transmembrane transport	4	4.8	0.00053
icosanoid biosynthetic process	4	4.8	0.00079
synaptogenesis	4	4.8	0.00087
regulation of transporter activity	4	4.8	0.00096
unsaturated fatty acid biosynthetic process	4	4.8	0.001
regulation of smooth muscle cell proliferation	4	4.8	0.0025
icosanoid metabolic process	4	4.8	0.0027
unsaturated fatty acid metabolic process	4	4.8	0.0034
negative regulation of secretion	4	4.8	0.0042
negative regulation of cell migration	4	4.8	0.0046
regulation of protein secretion	4	4.8	0.0049
cell growth	4	4.8	0.0056
synapse organization	4	4.8	0.0056
negative regulation of cell motion	4	4.8	0.0061
positive regulation of response to external stimulus	4	4.8	0.0064
regulation of synaptic plasticity	4	4.8	0.0064
response to vitamin	4	4.8	0.007
regulation of inflammatory response	4	4.8	0.01
response to lipopolysaccharide	4	4.8	0.011
response to cytokine stimulus	4	4.8	0.011
fatty acid biosynthetic process	4	4.8	0.011
positive regulation of growth	4	4.8	0.012
activation of MAPK activity	4	4.8	0.013
response to molecule of bacterial origin	4	4.8	0.014
developmental growth	4	4.8	0.015
acute inflammatory response	4	4.8	0.02
lung development	4	4.8	0.021
respiratory tube development	4	4.8	0.022
respiratory system development	4	4.8	0.026
positive regulation of secretion	4	4.8	0.027
female pregnancy	4	4.8	0.027
negative regulation of growth	4	4.8	0.027
gonad development	4	4.8	0.029
regulation of protein transport	4	4.8	0.03
ossification	4	4.8	0.031
regulation of establishment of protein localization	4	4.8	0.035
bone development	4	4.8	0.036
reproductive structure development	4	4.8	0.039
development of primary sexual characteristics	4	4.8	0.039
regulation of membrane potential	4	4.8	0.045
regulation of translation	4	4.8	0.047
regulation of body fluid levels	4	4.8	0.051
angiogenesis	4	4.8	0.057
sex differentiation	4	4.8	0.06
regulation of mitotic cell cycle	4	4.8	0.061
positive regulation of protein kinase cascade	4	4.8	0.076
positive regulation of cellular component organization	4	4.8	0.092
response to histamine	3	3.6	0.0001
negative regulation of calcium ion transport via voltage-gated calcium channel activity	3	3.6	0.00021
inhibition of adenylate cyclase activity by dopamine receptor signaling pathway	3	3.6	0.00021
dopamine transport	3	3.6	0.00034
activation of phospholipase C activity by dopamine receptor signaling pathway	3	3.6	0.00034
diet induced thermogenesis	3	3.6	0.00034
serotonin receptor signaling pathway	3	3.6	0.00034
positive regulation of neurotransmitter transport	3	3.6	0.00051
negative regulation of systemic arterial blood pressure	3	3.6	0.00071
heat generation	3	3.6	0.00094
regulation of dopamine metabolic process	3	3.6	0.00094
regulation of calcium ion transport via voltage-gated calcium channel activity	3	3.6	0.0012
synaptic transmission, dopaminergic	3	3.6	0.0012
regulation of catecholamine metabolic process	3	3.6	0.0012
neurological system process involved in regulation of systemic arterial blood pressure	3	3.6	0.0012
regulation of dopamine secretion	3	3.6	0.0018
prostanoid biosynthetic process	3	3.6	0.0018
prostaglandin biosynthetic process	3	3.6	0.0018
icosanoid secretion	3	3.6	0.0018
arachidonic acid secretion	3	3.6	0.0018
response to iron ion	3	3.6	0.0022
response to dietary excess	3	3.6	0.0026
regulation of cellular amine metabolic process	3	3.6	0.0026
positive regulation of amine transport	3	3.6	0.003
mating behavior	3	3.6	0.003
negative regulation of G-protein coupled receptor protein signaling pathway	3	3.6	0.003
regulation of sodium ion transport	3	3.6	0.003
positive regulation of heart contraction	3	3.6	0.003
biogenic amine catabolic process	3	3.6	0.0034
positive regulation of endothelial cell proliferation	3	3.6	0.0034
regulation of the force of heart contraction	3	3.6	0.0039
response to morphine	3	3.6	0.0039
response to isoquinoline alkaloid	3	3.6	0.0039
negative regulation of protein secretion	3	3.6	0.0039
associative learning	3	3.6	0.0044
response to nicotine	3	3.6	0.0044
vasoconstriction	3	3.6	0.0044
positive regulation of smooth muscle contraction	3	3.6	0.005
peptidyl-threonine phosphorylation	3	3.6	0.005
acid secretion	3	3.6	0.005
reproductive behavior	3	3.6	0.005
prostanoid metabolic process	3	3.6	0.0055
prostaglandin metabolic process	3	3.6	0.0055
positive regulation of positive chemotaxis	3	3.6	0.0055
regulation of positive chemotaxis	3	3.6	0.0055
cellular amino acid derivative catabolic process	3	3.6	0.0055
regulation of systemic arterial blood pressure by hormone	3	3.6	0.0061
collagen catabolic process	3	3.6	0.0061
positive regulation of muscle contraction	3	3.6	0.0067
long-chain fatty acid transport	3	3.6	0.0067
regulation of long-term neuronal synaptic plasticity	3	3.6	0.0067
peptidyl-threonine modification	3	3.6	0.0067
regulation of heart rate	3	3.6	0.0074
negative regulation of blood coagulation	3	3.6	0.0081
endocrine process	3	3.6	0.0081
response to acid	3	3.6	0.0088
positive regulation of multicellular organism growth	3	3.6	0.0095
vasodilation	3	3.6	0.01
negative regulation of coagulation	3	3.6	0.01
multicellular organismal catabolic process	3	3.6	0.01
mating	3	3.6	0.011
renal system process	3	3.6	0.012
fatty acid transport	3	3.6	0.012
collagen metabolic process	3	3.6	0.012
regulation of calcium ion transport into cytosol	3	3.6	0.013
positive regulation of chemotaxis	3	3.6	0.013
regulation of generation of precursor metabolites and energy	3	3.6	0.013
multicellular organismal macromolecule metabolic process	3	3.6	0.014
positive regulation of smooth muscle cell proliferation	3	3.6	0.014
regulation of chemotaxis	3	3.6	0.014
regulation of endothelial cell proliferation	3	3.6	0.015
sensory perception of pain	3	3.6	0.015
central nervous system neuron development	3	3.6	0.015
positive regulation of behavior	3	3.6	0.017
regulation of neuronal synaptic plasticity	3	3.6	0.019
multicellular organismal metabolic process	3	3.6	0.02
diencephalon development	3	3.6	0.02
memory	3	3.6	0.022
central nervous system neuron differentiation	3	3.6	0.023
positive regulation of homeostatic process	3	3.6	0.023
negative regulation of protein transport	3	3.6	0.023
hair cycle process	3	3.6	0.026
hair follicle development	3	3.6	0.026
molting cycle process	3	3.6	0.026
positive regulation of ion transport	3	3.6	0.026
molting cycle	3	3.6	0.027
hair cycle	3	3.6	0.027
regulation of peptide secretion	3	3.6	0.03
circadian rhythm	3	3.6	0.03
monocarboxylic acid transport	3	3.6	0.035
regulation of G-protein coupled receptor protein signaling pathway	3	3.6	0.037
fat cell differentiation	3	3.6	0.039
response to estradiol stimulus	3	3.6	0.041
response to heat	3	3.6	0.043
positive regulation of cell cycle	3	3.6	0.045
response to toxin	3	3.6	0.05
ovulation cycle process	3	3.6	0.052
tissue homeostasis	3	3.6	0.053
female gonad development	3	3.6	0.055
female gamete generation	3	3.6	0.057
regulation of hormone secretion	3	3.6	0.058
ovulation cycle	3	3.6	0.06
oxygen and reactive oxygen species metabolic process	3	3.6	0.06
regulation of neurotransmitter levels	3	3.6	0.06
regulation of peptidyl-tyrosine phosphorylation	3	3.6	0.061
development of primary female sexual characteristics	3	3.6	0.063
female sex differentiation	3	3.6	0.063
morphogenesis of a branching structure	3	3.6	0.071
intracellular receptor-mediated signaling pathway	3	3.6	0.073
amine biosynthetic process	3	3.6	0.083
positive regulation of organelle organization	3	3.6	0.087
neurotransmitter transport	3	3.6	0.087
steroid biosynthetic process	3	3.6	0.09
protein import into nucleus	3	3.6	0.092
negative regulation of protein kinase activity	3	3.6	0.094
striated muscle cell differentiation	3	3.6	0.096
nuclear import	3	3.6	0.096
negative regulation of kinase activity	3	3.6	0.099
nonassociative learning	2	2.4	0.012
inhibition of adenylate cyclase activity by muscarinic acetylcholine receptor signaling pathway	2	2.4	0.012
regulation of systemic arterial blood pressure by carotid sinus baroreceptor feedback	2	2.4	0.012
sensitization	2	2.4	0.012
regulation of systemic arterial blood pressure by baroreceptor feedback	2	2.4	0.012
activation of phospholipase C activity by serotonin receptor signaling pathway	2	2.4	0.012
positive regulation of the force of heart contraction by epinephrine-norepinephrine	2	2.4	0.012
norepinephrine-epinephrine vasoconstriction involved in regulation of systemic arterial blood pressure	2	2.4	0.012
negative regulation of dopamine receptor signaling pathway	2	2.4	0.012
positive regulation of dopamine uptake	2	2.4	0.012
positive regulation of neurotransmitter uptake	2	2.4	0.012
positive regulation of catecholamine uptake during transmission of nerve impulse	2	2.4	0.012
circadian regulation of gene expression	2	2.4	0.018
positive regulation of potassium ion transport	2	2.4	0.018
positive regulation of skeletal muscle tissue development	2	2.4	0.018
activation of phospholipase C activity by muscarinic acetylcholine receptor signaling pathway	2	2.4	0.018
positive regulation of the force of heart contraction by chemical signal	2	2.4	0.018
vasodilation by norepinephrine-epinephrine involved in regulation of systemic arterial blood pressure	2	2.4	0.018
positive regulation of heart rate by epinephrine-norepinephrine	2	2.4	0.018
regulation of dopamine receptor signaling pathway	2	2.4	0.018
interneuron migration from the subpallium to the cortex	2	2.4	0.023
cerebral cortex GABAergic interneuron migration	2	2.4	0.023
regulation of sodium:hydrogen antiporter activity	2	2.4	0.023
long term synaptic depression	2	2.4	0.023
positive regulation of muscle development	2	2.4	0.023
negative regulation of potassium ion transport	2	2.4	0.023
positive regulation of striated muscle development	2	2.4	0.023
cerebral cortex GABAergic interneuron development	2	2.4	0.023
regulation of the force of heart contraction by chemical signal	2	2.4	0.023
behavioral response to ethanol	2	2.4	0.023
dopamine catabolic process	2	2.4	0.023
substrate-independent telencephalic tangential migration	2	2.4	0.029
negative regulation of protein kinase B signaling cascade	2	2.4	0.029
catecholamine catabolic process	2	2.4	0.029
regulation of cellular pH reduction	2	2.4	0.029
substrate-independent telencephalic tangential interneuron migration	2	2.4	0.029
catechol catabolic process	2	2.4	0.029
diol catabolic process	2	2.4	0.029
negative regulation of behavior	2	2.4	0.035
peristalsis	2	2.4	0.035
positive regulation of synaptic transmission, glutamatergic	2	2.4	0.041
cerebral cortex GABAergic interneuron differentiation	2	2.4	0.041
cardiac muscle tissue growth	2	2.4	0.041
negative regulation of synaptic transmission, glutamatergic	2	2.4	0.041
cardiac muscle cell proliferation	2	2.4	0.041
adaptation of signaling pathway	2	2.4	0.041
desensitization of G-protein coupled receptor protein signaling pathway	2	2.4	0.041
regulation of proton transport	2	2.4	0.041
DNA topological change	2	2.4	0.041
heart growth	2	2.4	0.041
striated muscle cell proliferation	2	2.4	0.041
arginine catabolic process	2	2.4	0.046
regulation of platelet activation	2	2.4	0.046
negative regulation of multicellular organism growth	2	2.4	0.046
endoplasmic reticulum calcium ion homeostasis	2	2.4	0.046
positive regulation of release of sequestered calcium ion into cytosol	2	2.4	0.052
neurotransmitter catabolic process	2	2.4	0.052
muscle cell proliferation	2	2.4	0.052
adenohypophysis development	2	2.4	0.052
positive regulation of heart rate	2	2.4	0.058
regulation of sensory perception	2	2.4	0.058
ventricular cardiac muscle cell differentiation	2	2.4	0.058
T-helper 1 type immune response	2	2.4	0.058
phasic smooth muscle contraction	2	2.4	0.058
regulation of sensory perception of pain	2	2.4	0.058
positive regulation of blood coagulation	2	2.4	0.058
induction of positive chemotaxis	2	2.4	0.058
axon regeneration	2	2.4	0.058
defense response to Gram-negative bacterium	2	2.4	0.058
positive regulation of protein kinase B signaling cascade	2	2.4	0.063
regulation of circadian sleep/wake cycle	2	2.4	0.063
positive regulation of cAMP biosynthetic process	2	2.4	0.063
cerebral cortex neuron differentiation	2	2.4	0.063
lipopolysaccharide-mediated signaling pathway	2	2.4	0.063
circadian sleep/wake cycle process	2	2.4	0.063
regulation of circadian sleep/wake cycle, sleep	2	2.4	0.063
positive regulation of cAMP metabolic process	2	2.4	0.063
grooming behavior	2	2.4	0.063
fibrinolysis	2	2.4	0.069
elevation of cytosolic calcium ion concentration during G-protein signaling, coupled to IP3 second messenger (phospholipase C activating)	2	2.4	0.069
nitric oxide biosynthetic process	2	2.4	0.069
circadian sleep/wake cycle	2	2.4	0.069
neuron projection regeneration	2	2.4	0.069
positive regulation of vasodilation	2	2.4	0.069
negative regulation of heart contraction	2	2.4	0.074
positive regulation of coagulation	2	2.4	0.074
hair follicle maturation	2	2.4	0.074
nitric oxide metabolic process	2	2.4	0.074
retinoic acid receptor signaling pathway	2	2.4	0.074
arginine metabolic process	2	2.4	0.074
regulation of viral genome replication	2	2.4	0.08
ovulation	2	2.4	0.08
release of sequestered calcium ion into cytosol	2	2.4	0.08
negative regulation of sequestering of calcium ion	2	2.4	0.08
negative regulation of ossification	2	2.4	0.08
regulation of sequestering of calcium ion	2	2.4	0.08
circadian behavior	2	2.4	0.08
regulation of bone resorption	2	2.4	0.085
positive regulation of cyclic nucleotide metabolic process	2	2.4	0.085
regulation of bone remodeling	2	2.4	0.085
response to pH	2	2.4	0.085
positive regulation of cyclic nucleotide biosynthetic process	2	2.4	0.085
positive regulation of nucleotide metabolic process	2	2.4	0.085
regulation of release of sequestered calcium ion into cytosol	2	2.4	0.085
regulation of polysaccharide metabolic process	2	2.4	0.085
positive regulation of nucleotide biosynthetic process	2	2.4	0.085
telencephalon cell migration	2	2.4	0.091
rhythmic behavior	2	2.4	0.091
response to vitamin D	2	2.4	0.091
forebrain cell migration	2	2.4	0.096
response to amino acid stimulus	2	2.4	0.096

## Sheet: CC
cellular component
Term	Count	%	P-Value
plasma membrane	57	67.9	5.4e-15
intrinsic to membrane	50	59.5	0.00019
plasma membrane part	48	57.1	6.9e-18
integral to membrane	48	57.1	0.0004
intrinsic to plasma membrane	37	44	2.2e-17
integral to plasma membrane	36	42.9	9e-17
cell fraction	27	32.1	3.4e-10
insoluble fraction	23	27.4	2.3e-09
cell projection	22	26.2	4.8e-10
membrane fraction	22	26.2	7.1e-09
neuron projection	20	23.8	1e-13
axon	14	16.7	9.6e-12
cell junction	14	16.7	1.2e-05
cytosol	14	16.7	0.053
endoplasmic reticulum	12	14.3	0.028
organelle membrane	12	14.3	0.063
cell projection part	11	13.1	1.3e-06
endomembrane system	11	13.1	0.018
dendrite	10	11.9	5.5e-07
synapse	10	11.9	0.00027
organelle envelope	10	11.9	0.012
envelope	10	11.9	0.012
membrane raft	9	10.7	2.2e-06
cell surface	9	10.7	0.0011
postsynaptic membrane	8	9.5	1.6e-05
cell soma	8	9.5	6.6e-05
apical part of cell	8	9.5	9.9e-05
synapse part	8	9.5	0.00069
axon part	7	8.3	8e-07
organelle outer membrane	7	8.3	3.7e-05
outer membrane	7	8.3	4.6e-05
microsome	7	8.3	0.003
vesicular fraction	7	8.3	0.0035
sarcolemma	6	7.1	5e-05
mitochondrial outer membrane	6	7.1	0.00021
ion channel complex	6	7.1	0.0079
soluble fraction	6	7.1	0.04
extracellular matrix	6	7.1	0.057
mitochondrial membrane	6	7.1	0.089
nerve terminal	5	6	6.9e-05
external side of plasma membrane	5	6	0.019
nuclear envelope	5	6	0.035
asymmetric synapse	4	4.8	1.7e-05
caveola	4	4.8	0.0038
apical plasma membrane	4	4.8	0.046
perikaryon	3	3.6	0.014
chloride channel complex	3	3.6	0.043
platelet alpha granule	3	3.6	0.045
nuclear membrane	3	3.6	0.072
synaptosome	3	3.6	0.093

## Sheet: MF
molecular function
Term	Count	%	P-Value
amine receptor activity	22	26.2	1.3e-36
amine binding	20	23.8	1.4e-22
drug binding	16	19	5.7e-21
identical protein binding	10	11.9	0.021
neurotransmitter binding	9	10.7	2.9e-07
lipid binding	9	10.7	0.008
protein kinase activity	9	10.7	0.039
dopamine binding	8	9.5	1.2e-14
adrenoceptor activity	8	9.5	4e-14
alcohol binding	8	9.5	1.5e-10
neurotransmitter receptor activity	8	9.5	2.4e-06
protein homodimerization activity	8	9.5	0.0055
ion channel activity	8	9.5	0.012
substrate specific channel activity	8	9.5	0.014
channel activity	8	9.5	0.016
passive transmembrane transporter activity	8	9.5	0.016
protein dimerization activity	8	9.5	0.058
peptidase activity	8	9.5	0.074
carbonate dehydratase activity	7	8.3	4.3e-10
hydro-lyase activity	7	8.3	3.3e-07
iron ion binding	7	8.3	0.014
gated channel activity	7	8.3	0.014
protein serine/threonine kinase activity	7	8.3	0.057
alpha-adrenergic receptor activity	6	7.1	5.6e-11
acetylcholine binding	6	7.1	1.8e-07
endopeptidase activity	6	7.1	0.092
dopamine receptor activity	5	6	7.7e-09
G-protein coupled acetylcholine receptor activity	5	6	7.7e-09
muscarinic acetylcholine receptor activity	5	6	7.7e-09
acetylcholine receptor activity	5	6	4.4e-06
heme binding	5	6	0.0075
ligand-gated ion channel activity	5	6	0.0089
ligand-gated channel activity	5	6	0.0089
tetrapyrrole binding	5	6	0.0093
electron carrier activity	5	6	0.053
cation channel activity	5	6	0.099
serotonin binding	4	4.8	2.1e-05
serotonin receptor activity	4	4.8	6.9e-05
potassium channel regulator activity	4	4.8	0.00074
channel regulator activity	4	4.8	0.0063
alpha1-adrenergic receptor activity	3	3.6	0.00012
dopamine receptor activity, coupled via Gi/Go	3	3.6	0.00012
alpha2-adrenergic receptor activity	3	3.6	0.00012
monoamine transmembrane transporter activity	3	3.6	0.0004
opioid receptor activity	3	3.6	0.0014
neurotransmitter:sodium symporter activity	3	3.6	0.0071
neurotransmitter transporter activity	3	3.6	0.01
phosphoinositide phospholipase C activity	3	3.6	0.011
extracellular matrix binding	3	3.6	0.013
phospholipase C activity	3	3.6	0.017
NADP or NADPH binding	3	3.6	0.022
collagen binding	3	3.6	0.022
steroid hormone receptor activity	3	3.6	0.039
solute:sodium symporter activity	3	3.6	0.044
ligand-dependent nuclear receptor activity	3	3.6	0.053
steroid binding	3	3.6	0.063
oxidoreductase activity, acting on single donors with incorporation of molecular oxygen, incorporation of two atoms of oxygen	3	3.6	0.067
oxidoreductase activity, acting on single donors with incorporation of molecular oxygen	3	3.6	0.068
diacylglycerol binding	3	3.6	0.07
extracellular ligand-gated ion channel activity	3	3.6	0.077
chloride channel activity	3	3.6	0.077
amine transmembrane transporter activity	3	3.6	0.081
chloride ion binding	3	3.6	0.087
anion channel activity	3	3.6	0.089
phospholipase activity	3	3.6	0.099
dopamine receptor activity, coupled via Gs	2	2.4	0.013
prostaglandin-endoperoxide synthase activity	2	2.4	0.013
norepinephrine binding	2	2.4	0.019
nitric-oxide synthase activity	2	2.4	0.019
tetrahydrobiopterin binding	2	2.4	0.019
beta-adrenergic receptor activity	2	2.4	0.019
arginine binding	2	2.4	0.019
DNA topoisomerase (ATP-hydrolyzing) activity	2	2.4	0.025
amine oxidase activity	2	2.4	0.032
DNA topoisomerase activity	2	2.4	0.038
G-protein alpha-subunit binding	2	2.4	0.044
retinoid-X receptor activity	2	2.4	0.056
retinoic acid receptor activity	2	2.4	0.074
FMN binding	2	2.4	0.074
MAP kinase activity	2	2.4	0.086
oxidoreductase activity, acting on the CH-NH2 group of donors, oxygen as acceptor	2	2.4	0.086

## Sheet: Pathway
pathway analysis of common targets
Term	Count	%	P-Value
Neuroactive ligand-receptor interaction	27	32.1	7.3e-17
Pathways in cancer	17	20.2	6.3e-06
Calcium signaling pathway	16	19	9.2e-09
Regulation of actin cytoskeleton	12	14.3	0.00014
Gap junction	11	13.1	2.7e-07
Vascular smooth muscle contraction	9	10.7	0.00013
Bladder cancer	9	10.7	7e-08
Focal adhesion	9	10.7	0.006
VEGF signaling pathway	8	9.5	6.5e-05
Non-small cell lung cancer	8	9.5	7.3e-06
Nitrogen metabolism	7	8.3	4.6e-07
Glioma	7	8.3	0.0002
Small cell lung cancer	7	8.3	0.00096
Prostate cancer	7	8.3	0.0013
Thyroid cancer	6	7.1	3.9e-05
Acute myeloid leukemia	6	7.1	0.0011
ErbB signaling pathway	6	7.1	0.0066
GnRH signaling pathway	6	7.1	0.011
Endometrial cancer	5	6	0.0054
Arginine and proline metabolism	5	6	0.0058
Long-term potentiation	5	6	0.014
Long-term depression	5	6	0.015
Renal cell carcinoma	5	6	0.015
Melanoma	5	6	0.016
Pancreatic cancer	5	6	0.017
Chronic myeloid leukemia	5	6	0.019
Fc epsilon RI signaling pathway	5	6	0.022
Colorectal cancer	5	6	0.028
Melanogenesis	5	6	0.047
Neurotrophin signaling pathway	5	6	0.09
Aldosterone-regulated sodium reabsorption	4	4.8	0.018
mTOR signaling pathway	4	4.8	0.034
Arachidonic acid metabolism	4	4.8	0.041
Pathogenic Escherichia coli infection	4	4.8	0.043
Adipocytokine signaling pathway	4	4.8	0.064
PPAR signaling pathway	4	4.8	0.069
B cell receptor signaling pathway	4	4.8	0.084
Prion diseases	3	3.6	0.083

## Sheet: Genes
genes involed in each pathway
Pathway name	Gene name
VEGF signaling pathway	MAPK1
	MAPK3
	RAF1
	MAP2K2
	PRKCA
	VEGFA
	PTGS2
	NOS3
Vascular smooth muscle contraction	MAPK1
	MAPK3
	RAF1
	MAP2K2
	PRKCA
	ROCK2
	ADRA1A
	ADRA1B
	ADRA1D
Thyroid cancer	MAPK1
	MAPK3
	MAP2K2
	CCND1
	RXRA
	RXRB
Small cell lung cancer	CCND1
	BCL2
	RXRA
	RXRB
	ITGA2B
	NOS2
	PTGS2
Renal cell carcinoma	MAPK1
	MAPK3
	RAF1
	MAP2K2
	VEGFA
Regulation of actin cytoskeleton	MAPK1
	MAPK3
	RAF1
	MAP2K2
	ITGA2B
	ROCK2
	CHRM1
	CHRM2
	CHRM3
	CHRM5
	CHRM4
	F2
Prostate cancer	MAPK1
	MAPK3
	RAF1
	MAP2K2
	CCND1
	MTOR
	BCL2
	MAPK1
	MAPK3
	MAP2K2
PPAR signaling pathway	RXRA
	RXRB
	MMP1
	CPT1A
Pathways in cancer	MAPK1
	MAPK3
	RAF1
	MAP2K2
	PRKCA
	CCND1
	MTOR
	VEGFA
	BCL2
	RXRA
	RXRB
	ITGA2B
	NOS2
	PTGS2
	MMP1
	MMP2
	MMP9
Pathogenic Escherichia coli infection	PRKCA
	ROCK2
	TUBB1
	TLR4
Pancreatic cancer	MAPK1
	MAPK3
	RAF1
	CCND1
	VEGFA
Non-small cell lung cancer	MAPK1
	MAPK3
	RAF1
	MAP2K2
	PRKCA
	CCND1
	RXRA
	RXRB
Nitrogen metabolism	CA1
	CA12
	CA14
	CA2
	CA3
	CA4
	CA7
Neurotrophin signaling pathway	MAPK1
	MAPK3
	RAF1
	MAP2K2
	BCL2
Neuroactive ligand-receptor interaction	ADRA1A
	ADRA1B
	ADRA1D
	ADRB1
	CHRM1
	CHRM2
	CHRM3
	CHRM5
	DRD1
	HTR2A
	HTR2C
	ADRB2
	CHRM4
	DRD2
	DRD5
	F2
	ADRA2A
	ADRA2B
	ADRA2C
	DRD3
	DRD4
	GABRB2
	GABRB3
	HTR1A
	OPRD1
	OPRM1
	TRPV1
mTOR signaling pathway	MAPK1
	MAPK3
	MTOR
	VEGFA
Melanoma	MAPK1
	MAPK3
	RAF1
	MAP2K2
	CCND1
Melanogenesis	MAPK1
	MAPK3
	RAF1
	MAP2K2
	PRKCA
Long-term potentiation	MAPK1
	MAPK3
	RAF1
	MAP2K2
	PRKCA
	MAPK1
	MAPK3
	RAF1
	MAP2K2
	PRKCA
GnRH signaling pathway	MAPK1
	MAPK3
	RAF1
	MAP2K2
	PRKCA
	MMP2
Glioma	MAPK1
	MAPK3
	RAF1
	MAP2K2
	PRKCA
	CCND1
	MTOR
Gap junction	MAPK1
	MAPK3
	RAF1
	MAP2K2
	PRKCA
	ADRB1
	DRD1
	HTR2A
	HTR2C
	DRD2
	TUBB1
Focal adhesion	MAPK1
	MAPK3
	RAF1
	PRKCA
	CCND1
	VEGFA
	BCL2
	ITGA2B
	ROCK2
Fc epsilon RI signaling pathway	MAPK1
	MAPK3
	RAF1
	MAP2K2
	PRKCA
ErbB signaling pathway	MAPK1
	MAPK3
	RAF1
	MAP2K2
	PRKCA
	MTOR
Endometrial cancer	MAPK1
	MAPK3
	RAF1
	MAP2K2
	CCND1
Colorectal cancer	MAPK1
	MAPK3
	RAF1
	CCND1
	BCL2
Chronic myeloid leukemia	MAPK1
	MAPK3
	RAF1
	MAP2K2
	CCND1
Calcium signaling pathway	PRKCA
	NOS2
	ADRA1A
	ADRA1B
	ADRA1D
	ADRB1
	CHRM1
	CHRM2
	CHRM3
	CHRM5
	DRD1
	HTR2A
	HTR2C
	NOS3
	ADRB2
	DRD5
Bladder cancer	MAPK1
	MAPK3
	RAF1
	MAP2K2
	CCND1
	VEGFA
	MMP1
	MMP2
	MMP9
B cell receptor signaling pathway	MAPK1
	MAPK3
	RAF1
	MAP2K2
Arginine and proline metabolism	NOS2
	NOS3
	MAOA
	MAOB
	SMS
Arachidonic acid metabolism	PTGS2
	ALOX5
	PTGS1
	TBXAS1
Aldosterone-regulated sodium reabsorption	MAPK1
	MAPK3
	PRKCA
	HSD11B1
Adipocytokine signaling pathway	MTOR
	RXRA
	RXRB
	CPT1A
Acute myeloid leukemia	MAPK1
	MAPK3
	RAF1
	MAP2K2
	CCND1
	MTOR
